1 **Extensive profiling of histidine-containing dipeptides reveals species-specific distribution and**  
2 **metabolism in mice, rats and humans**

3 **Short title:** Profiling of histidine-containing dipeptides

4 Thibaux Van der Stede<sup>1,2,†</sup>, Jan Spaas<sup>1,3,4,†</sup>, Sarah de Jager<sup>1,†</sup>, Jana De Brandt<sup>4,5</sup>, Camilla Hansen<sup>2</sup>, Bjarne  
5 Vercammen<sup>1</sup>, Siegrid De Baere<sup>6</sup>, Siska Croubels<sup>6</sup>, Ruud Van Thienen<sup>1</sup>, Kenneth Verboven<sup>4,5</sup>, Dominique  
6 Hansen<sup>4,5,7</sup>, Thierry Bové<sup>8</sup>, Bruno Lapauw<sup>9</sup>, Charles Van Praet<sup>10,11</sup>, Karel Decaestecker<sup>10,11</sup>, Bart  
7 Vanaudenaerde<sup>12</sup>, Bert O Eijnde<sup>3,13,14</sup>, Lasse Gliemann<sup>2</sup>, Ylva Hellsten<sup>2</sup>, Wim Derave<sup>1,\*</sup>

8 <sup>1</sup> Department of Movement and Sports Sciences, Ghent University, Belgium.

9 <sup>2</sup> Department of Nutrition, Exercise and Sports, Copenhagen University, Denmark.

10 <sup>3</sup> University MS Center (UMSC) Hasselt – Pelt, Belgium.

11 <sup>4</sup> BIOMED Biomedical Research Institute, Hasselt University, Belgium.

12 <sup>5</sup> REVAL Rehabilitation Research Center, Hasselt University, Belgium.

13 <sup>6</sup> Department of Pathobiology, Pharmacology and Zoological Medicine, Ghent University, Belgium.

14 <sup>7</sup> Heart Center Hasselt, Jessa Hospital Hasselt, Belgium.

15 <sup>8</sup> Department of Cardiac Surgery, Ghent University Hospital, Belgium.

16 <sup>9</sup> Department of Endocrinology, Ghent University Hospital, Belgium.

17 <sup>10</sup> Department of Urology, Ghent University Hospital, Belgium.

18 <sup>11</sup> Department of Human Structure and Repair, Ghent University, Belgium.

19 <sup>12</sup> Department of Chronic Diseases and Metabolism, KU Leuven, Belgium.

20 <sup>13</sup> SMRC Sports Medical Research Center, BIOMED Biomedical Research Institute, Hasselt University,  
21 Belgium.

22 <sup>14</sup> Division of Sport Science, Stellenbosch University, South Africa.

23 <sup>†</sup> These authors have contributed equally

24 <sup>\*</sup> Correspondence: Wim.Derave@UGent.be

## 25 **Abstract**

26 Histidine-containing dipeptides (HCDs) are pleiotropic homeostatic molecules linked to inflammatory,  
27 metabolic and neurological diseases, as well as exercise performance. Using a sensitive UHPLC-MS/MS  
28 approach and an optimized quantification method, we performed a systematic and extensive profiling  
29 of HCDs in the mouse, rat, and human body (in n=26, n=25, n=19 tissues, respectively). Our data show  
30 that tissue HCD levels are uniquely regulated by carnosine synthase, an enzyme preferentially  
31 expressed by fast-twitch skeletal muscle fibers and brain oligodendrocytes. Cardiac HCD levels are  
32 remarkably low. The low abundant HCD N-acetylcarnosine is enriched in human skeletal muscles. Here,  
33 N-acetylcarnosine is continuously secreted into the circulation as the most stable plasma HCD, which  
34 is further induced by acute exercise in a myokine-like fashion. Carnosine is preferentially transported  
35 within red blood cells in humans but not rodents. We provide a novel basis to unravel tissue-specific,  
36 paracrine, and endocrine roles of HCDs in human health and disease.

37

38 **Teaser:** Human muscle releases N-acetylcarnosine at rest and especially during exercise, potentially  
39 initiating tissue crosstalk.

## 40 Introduction

41 Carnosine synthase (CARNS1) is presumably the only enzyme in animals capable of synthesizing an  
42 abundant class of endogenous dipeptides. The enzyme links L-histidine to either  $\beta$ -alanine or  $\gamma$ -  
43 aminobutyric acid (GABA), respectively rendering carnosine or homocarnosine. These parent  
44 dipeptides and their methylated (anserine and balenine) and acetylated (N-acetylcarnosine) analogs  
45 are collectively called the histidine-containing dipeptides (HCDs).

46 Since the initial discovery in 1900 by Vladimir Gulevich (1), carnosine and the other HCDs have been  
47 linked to various physiological functions, mostly serving to preserve redox status and cellular  
48 homeostasis (for a full overview, see (2)). The most relevant biochemical properties for their functions  
49 relate to proton buffering, metal chelation and antioxidant capacity, which further translates to  
50 protection against advanced glycation and lipoxidation end products (3, 4). The physiological  
51 importance of tissue HCD content is underscored by an extensive body of research ranging from  
52 enhancement of exercise performance (5) to treatment of cardiometabolic (6, 7) or neurological  
53 diseases (8) in rodents. Major differences between animal and human HCD metabolism may be present  
54 however, given that high carnosinase (CN1) activity in human, but not rodent, plasma results in rapid  
55 degradation of carnosine (9, 10).

56 Nevertheless, even more than 120 years after the initial discovery of carnosine and 10 years after the  
57 molecular identification of CARNS1 (11), there remains a lack of basic understanding of HCD synthesis,  
58 distribution, and metabolism throughout the animal and especially the human body. It is thought that  
59 HCDs are primarily expressed in excitable tissues such as skeletal and cardiac muscle and the central  
60 nervous system (CNS), but current literature mostly consists of scattered observations focussing on a  
61 limited number of tissues or species. Information on cardiac levels is sparse, although HCDs could play  
62 an important role in cardiomyocyte homeostasis (12). Furthermore, there is unclarity regarding the  
63 synthesis and physiological role of HCDs in kidney, lung, liver, and other non-excitabile tissues. A first  
64 profiling of HCDs in rat tissues from Aldini *et al.* (13) did not detect HCDs in non-excitabile tissues,  
65 although this and other previous endeavours were potentially limited from lower detection sensitivity  
66 compared to the currently available technology. For example, the low abundant HCDs anserine,  
67 balenine and N-acetylcarnosine have never been extensively characterized in animal or human tissues.

68 Here, we have performed the first systematic profiling of the five main HCDs, combined with  
69 determination of CARNS1 expression levels, in the mouse, rat and human body. Various human tissue  
70 samples were collected from live donors, except for post-mortem collected brain regions. We  
71 uncovered profound differences in HCD distribution and metabolism between tissues and species. For

72 instance, we demonstrate that humans have a unique way of circulating HCDs and releasing it from  
73 carnosine-synthesizing tissues such as skeletal muscle.

74

## 75 **Results**

### 76 CARNS1 is the unique and rate-limiting enzyme for HCD synthesis

77 Using whole-body *Carns1*-knockout (KO) mice, we aimed to investigate whether CARNS1 deficiency  
78 results in a complete lack of endogenous (homo)carnosine and their derivatives in a variety of tissues,  
79 which would imply that CARNS1 is the unique and rate-limiting enzyme for HCD synthesis. CARNS1 was  
80 successfully knocked out at the gene (**Fig 1A**) and protein (100 kDa, **Fig 1B**) level, thereby also validating  
81 our Western blot antibody for specifically detecting the CARNS1 protein. As described previously,  
82 *Carns1*-KO mice displayed normal growth and survival (14). The deletion of *Carns1* led to an absence  
83 of carnosine and homocarnosine in all investigated tissues (**Fig 1C**). Similarly, these mice were devoid  
84 of the carnosine-derived analogs anserine, balenine and N-acetylcarnosine (of which only anserine is  
85 consistently present in mouse tissues, cfr. *infra*, **Fig 1C**).

86 In addition, tissue from *Carns1*-KO mice was used to optimise our quantitative UHPLC-MS/MS-based  
87 detection of HCDs. Concentration levels in muscle and brain were compared using matrix-matched  
88 standard calibration curve preparation in *Carns1*-KO tissue matrix (i.e. muscle or brain homogenates)  
89 and water (as current standard practice in HCD research). In water, HCD levels were overestimated by  
90 ~2 to 3-fold (**Fig 1D-E**), indicating the importance of utilizing a corresponding blank tissue matrix for  
91 HCD quantification. This approach was used for all further analyses in this paper (except human  
92 cerebrospinal fluid), rendering the HCD quantifications more accurate than previously reported.

93

### 94 HCDs are not excitable tissue-specific metabolites

95 Using our sensitive UHPLC-MS/MS method, we performed a systematic profiling of HCDs in various  
96 tissues of the mouse, rat, and human body (**Fig 1F, Table S1**). Carnosine was the only HCD present in  
97 all studied tissues across the three species. Skeletal muscles contained the largest amounts of HCDs,  
98 followed by the CNS, up to the millimolar range. However, not all excitable tissue contained large  
99 amounts of HCDs, since unexpectedly low HCD levels were observed in the heart of all three species  
100 (50-100 times lower than skeletal muscles). These low HCD levels in cardiac tissue better reflect those  
101 measured in non-excitable tissues. Besides skeletal muscle, CNS, heart, kidney, adipose, lung and liver

102 tissue (presented in **Fig 1F**), we also found low levels of HCDs in the mouse and rat stomach wall,  
 103 gallbladder, pancreas, small intestine, colon, thymus, spleen, and eye (**Table S1**).

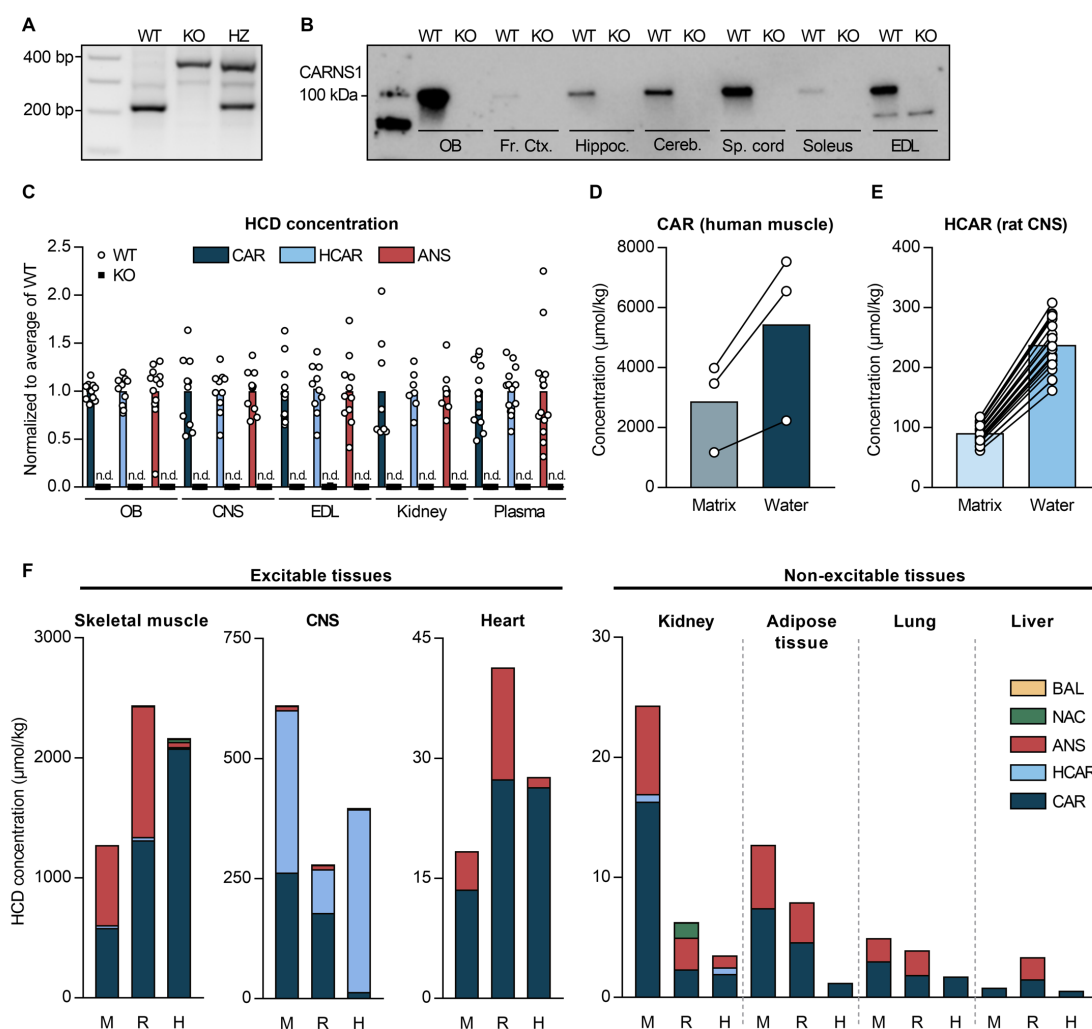

104  
 105 **Figure 1. Species- and tissue-specific distribution of histidine-containing dipeptides.** (A) PCR gel and (B) Western blot showing the successful knockout of the *Carns1* gene and the absence of CARNs1 protein in mice. (C) HCD measurements  
 106 by UHPLC-MS/MS showing HCDs are absent from various tissues of *Carns1*-KO compared to WT mice. (D) Carnosine and  
 107 (E) homocarnosine measured by UHPLC-MS/MS, followed by quantification based on a standard calibration curve  
 108 prepared in water vs. *Carns1*-KO tissue matrix. (F) HCD measurements by UHPLC-MS/MS in skeletal muscle, CNS, heart,  
 109 kidney, adipose tissue, lung, and liver tissue from mice (M), rats (R) and humans (H). Values were averaged if more than  
 110 1 type of the respective tissue was present (e.g. soleus and EDL for rodent muscle). ANS, anserine; BAL, balenine; CAR,  
 111 carnosine; Cereb., cerebellum; CNS, central nervous system; EDL, extensor digitorum longus; Fr. ctx., frontal cortex;  
 112 HCAR, homocarnosine; Hippoc., hippocampus; HZ, heterozygous; KO, knockout; NAC, N-acetylcarnosine; OB, olfactory  
 113 bulb; Sp. cord, spinal cord; WT, wild type.

115

### 116 CARNs1 content drives fiber type-related differences in HCD content in skeletal muscle

117 We next aimed to profile the HCD content in skeletal muscle in more detail, with a focus on potential  
 118 fiber type-specific differences. In mice and rats, we determined the HCD content in soleus (more  
 119 oxidative, slow-twitch) and extensor digitorum longus (EDL; more glycolytic, fast-twitch) muscles. Our

120 results confirmed previous reports (15-17) that carnosine and anserine content is higher in EDL muscle  
 121 (Fig 2A). Also the homocarnosine content was ~2.5-fold higher in EDL compared to soleus in both mice  
 122 and rats (Fig 2B). To get more insights if CARNs1 content (i.e. HCD production) is the main driver for  
 123 the fiber type-related differences, we first explored a publicly available human muscle fiber type-  
 124 specific RNAseq dataset (18). These data show a ~2-fold higher CARNs1 mRNA content in type IIa vs.  
 125 type I fibers (Fig 2C). We next determined CARNs1 protein levels in the soleus and EDL muscles from  
 126 the mice and rats (Fig 2D-E). CARNs1 levels were indeed higher in EDL muscles, with a larger difference  
 127 between soleus and EDL muscles in mice (6.6-fold) than in rats (1.4-fold). To translate mRNA  
 128 differences in human muscle to the protein level, we used Western blotting on pools of pre-classified  
 129 type I or type IIa fibers (Fig S1). This revealed a ~2-fold higher CARNs1 content in type IIa fibers (Fig  
 130 2D-E), consistent with findings at the mRNA level. These results suggest that CARNs1 expression is the  
 131 main driver regulating the clear fiber type-related differences in HCD content across the three species.

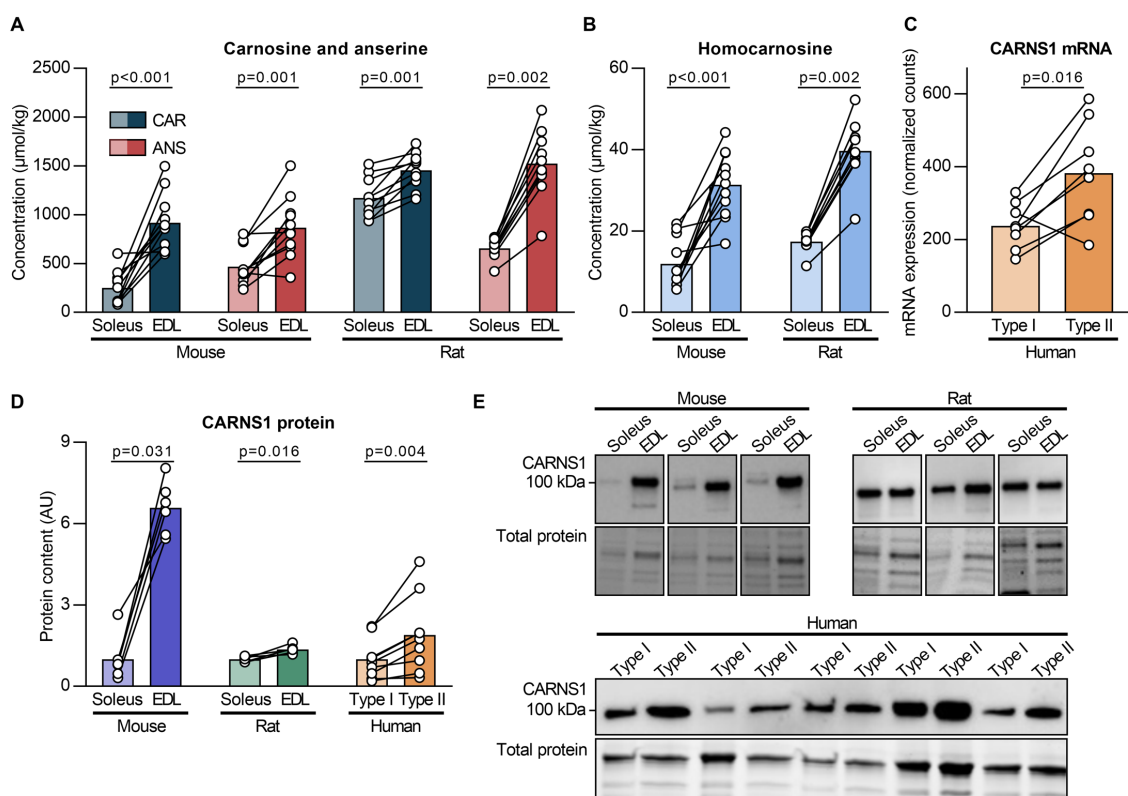

132  
 133 **Figure 2. Muscle and muscle fiber type-specific differences in histidine-containing dipeptides and CARNs1.** (A)  
 134 Carnosine and anserine and (B) measurements by UHPLC-MS/MS in soleus and EDL muscles from mice and rats. (C)  
 135 Human muscle fiber type-specific calculation of CARNs1 mRNA based on a previously published dataset. (D)  
 136 Protein levels of CARNs1 determined by Western blot in soleus and EDL muscle from mice and rats, and human type I and type  
 137 II fiber pools. (E) Representative Western blot and loading controls. ANS, anserine; CAR, carnosine; EDL, extensor  
 138 digitorum longus.

139  
 140  
 141

142 Homocarnosine is the dominant HCD in the CNS, except for the olfactory bulb of rodents

143 Apart from skeletal muscle, HCDs are also highly present in the CNS. By analyzing seven different  
144 regions from the mouse, rat and human CNS, we could confirm that the highest levels of carnosine are  
145 found in the olfactory bulb in rodents, reaching concentrations of ~1200  $\mu\text{mol/kg}$  tissue, which is  
146 similar to or even higher than skeletal muscle carnosine levels (**Fig 3A, Table S1**). In contrast, the  
147 human olfactory bulb contained approximately 15 times less carnosine (~80  $\mu\text{mol/kg}$ ). In mice and  
148 rats, the olfactory bulb was the only CNS region containing more carnosine than homocarnosine, whilst  
149 in humans all regions contained more homocarnosine than carnosine. Similar to our findings in human  
150 CNS tissue, homocarnosine was also abundantly present in human cerebrospinal fluid (**Fig 3B**).

151 CARNS1 protein levels also showed considerable variability between CNS regions (**Fig 3C-D**). Mice and  
152 rats exhibited high expression in olfactory bulb, as well as the spinal cord and medulla oblongata, but  
153 not the rest of the CNS. In human tissues, we found lower CARNS1 levels in the olfactory bulb, but  
154 instead observed greater amounts in the white matter, thalamus, and frontal cortex.

155 Immunofluorescence was used to further study the localisation of CARNS1 in the CNS. We chose the  
156 region exhibiting the greatest CARNS1 protein levels among rodents (mouse olfactory bulb) and  
157 humans (white matter). Double-labeling of CARNS1 and OLIG2, an oligodendrocyte lineage marker,  
158 revealed that CARNS1 resides in oligodendrocytes of human white matter (**Fig 3E**). Cell markers for  
159 microglia (CD68, **Fig S2A**), astrocytes (GFAP, **Fig S2B**) and neurons/axons (NF-H, **Fig S2C**) did not co-  
160 localise with CARNS1. In the mouse olfactory bulb, CARNS1 appeared in spherical structures near the  
161 surface of the olfactory bulb, i.e. the glomeruli, where olfactory nerve terminals form synapses with  
162 dendrites from projection neurons that carry signals into the brain (**Fig 3F**).

163

164 CARNS1 expression scales with tissue HCD levels on a whole-body level

165 To investigate if tissue CARNS1 expression closely relates to tissue HCD levels, CARNS1 protein levels  
166 (Western blot) were plotted against HCD concentrations (UHPLC-MS/MS). If the tissue CARNS1 level is  
167 the main determinant of tissue HCD levels, a linear relation between both variables is expected. In all  
168 non-excitable tissues, no CARNS1 could be detected by Western blot (**Fig 4A-C**). HCD levels in these  
169 tissues probably reflect transmembrane HCD uptake. On a whole-body level, CARNS1 scaled with HCD  
170 levels in mice (**Fig 4A**), rats (**Fig 4B**) and humans (**Fig 4C**). However, when comparing within organs,  
171 more CARNS1 was not always directly linked to a higher HCD concentration. In the human CNS, for  
172 example, CARNS1 was 13-fold higher in white matter than in the cerebellum, but both tissues had  
173 similar HCD levels. This indicates that although CARNS1 is the only enzyme responsible for HCD

174 synthesis, other factors, such as exchange of HCDs between organs or a high HCD turnover rate  
 175 (synthesis/degradation), could also influence intracellular HCD levels.

176

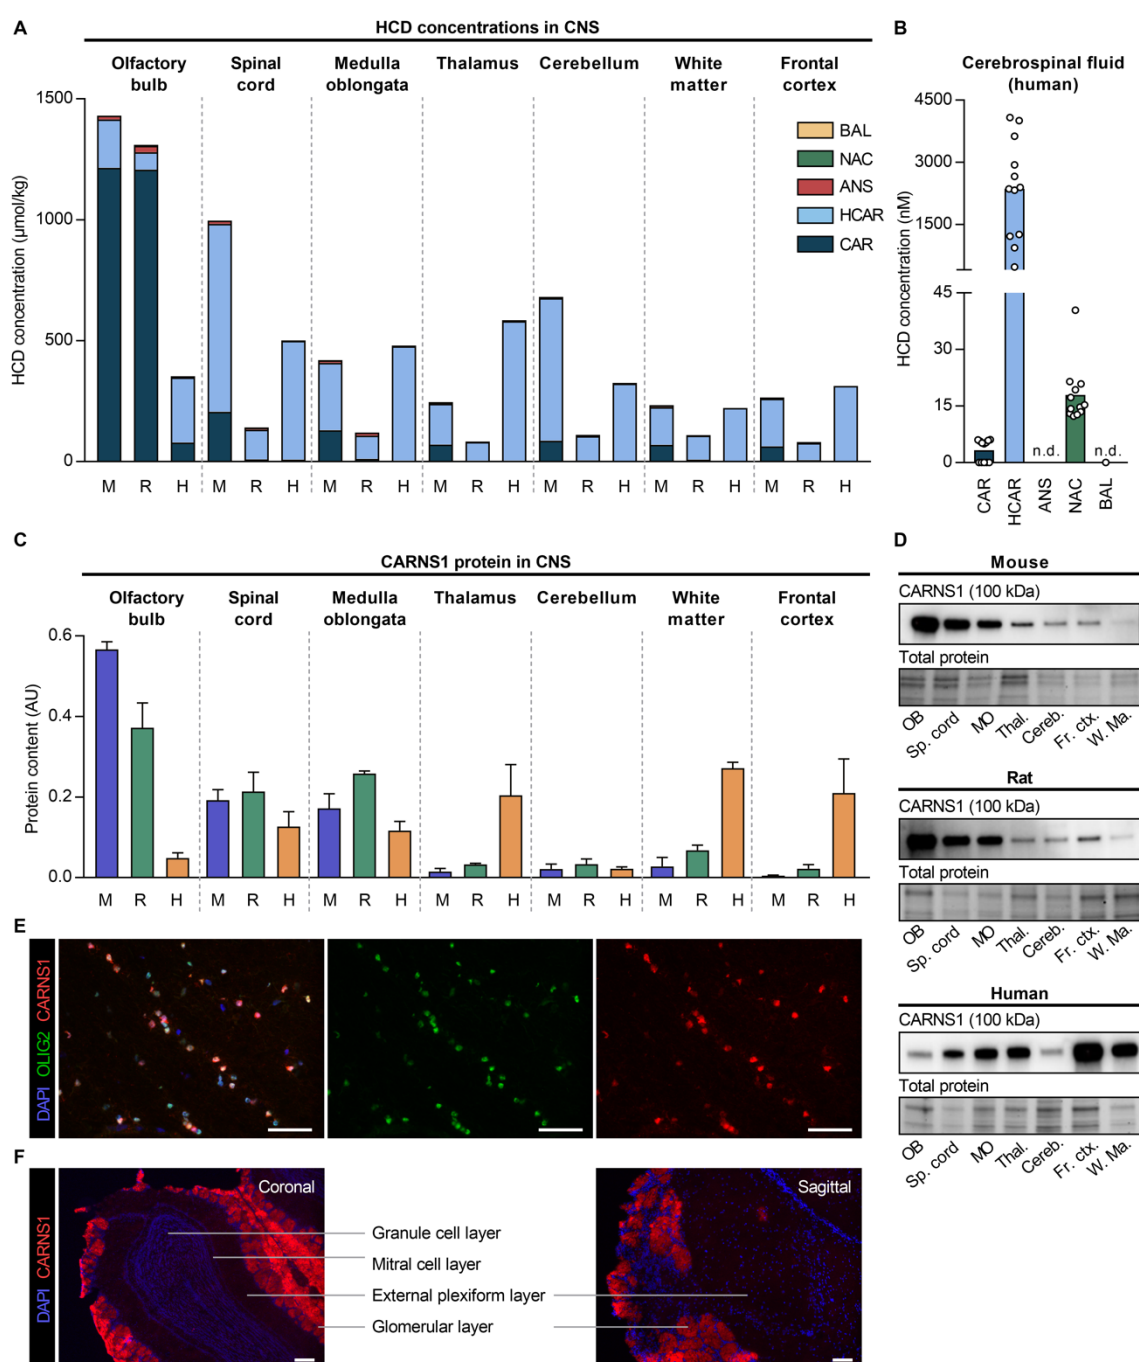

177  
 178 **Figure 3. Region-specific levels of histidine-containing dipeptides and CARNIS1 in the mouse, rat and human central**  
 179 **nervous system. (A)** HCD measurements by UHPLC-MS/MS in seven different central nervous system regions from mice  
 180 (M), rats (R) and humans (H). **(B)** HCD measurements by UHPLC-MS/MS in human cerebrospinal fluid. **(C)** Protein levels  
 181 of CARNIS1 determined by Western blot in seven different central nervous system regions from mice, rats and humans.  
 182 Data are mean  $\pm$  SD. **(D)** Representative Western blot and loading controls. **(E)** Immunohistochemical detection of  
 183 CARNIS1 and OLIG2 in human white matter. **(F)** Immunohistochemical detection of CARNIS1 in mouse olfactory bulb. In  
 184 panels (A), (C) and (D), spinal cord tissue is from the cervical region, mouse white matter is from the corpus callosum,



185 and human frontal cortex is from the superior frontal gyrus. ANS, anserine; AU, arbitrary units; BAL, balenine; CAR, carnosine; Cereb., cerebellum; CNS, central nervous system; Fr. ctx., frontal cortex; HCAR, homocarnosine; MO, medulla oblongata; NAC, N-acetylcarnosine; OB, olfactory bulb; Sp. cord, spinal cord; Thal., thalamus; W. Ma., white matter. Scale bars are 50  $\mu$ m (E), 100  $\mu$ m (F).

189

190

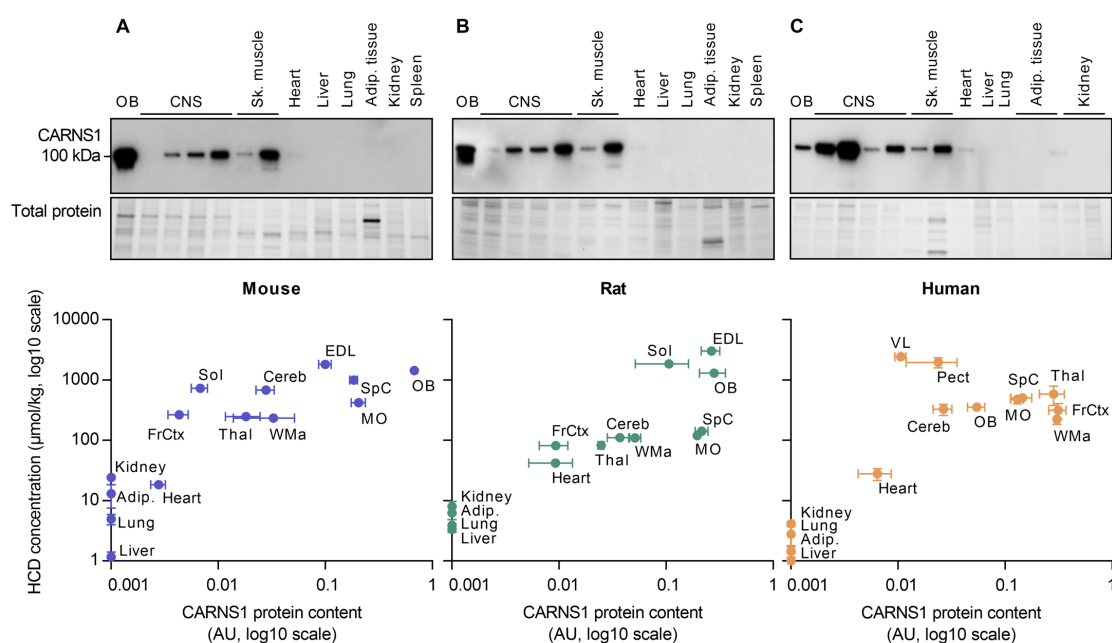

191

192 **Figure 4. Association between CARNS1 and tissue histidine-containing dipeptide levels.** Plotted relationship between  
 193 CARNS1 levels (Western blot) and HCD measurements (UHPLC-MS/MS) in a variety of (A) mouse, (B) rat, and (C)  
 194 human tissues. The central nervous system (CNS) regions that are shown, besides the olfactory bulb (OB), are frontal cortex  
 195 (FrCtx), cerebellum (Cereb), spinal cord (SpC), thalamus (Thal), white matter (WMa) and medulla oblongata (MO). Mouse  
 196 muscles are soleus (Sol) and extensor digitorum longus (EDL). Human muscles are m. vastus lateralis (VL) and m.  
 197 pectoralis (Pect). Human adipose tissue is subcutaneous and visceral fat (Adip). Human kidney is medulla and cortex.  
 198 Data are mean  $\pm$  SEM. AU, arbitrary units.

199

## 200 N-acetylcarnosine and balenine are mainly found in human skeletal muscle

201 Whilst the parent HCDs (carnosine and homocarnosine) were ubiquitously expressed, most of the  
 202 examined tissues also contained at least one methylated (anserine or balenine) or acetylated (N-  
 203 acetylcarnosine) carnosine analog (Fig 1F). Rodent skeletal muscles contained by far the highest  
 204 anserine levels (up to  $\sim$ 1500  $\mu$ mol/kg in the rat EDL, Fig 5A). Besides anserine ( $\sim$ 40  $\mu$ mol/kg, Fig 5A),  
 205 human skeletal muscle also contained N-acetylcarnosine ( $\sim$ 25  $\mu$ mol/kg, Fig 5B) and balenine ( $\sim$ 5  
 206  $\mu$ mol/kg, Fig 5C). In fact, human skeletal muscle was the tissue where we observed the highest N-  
 207 acetylcarnosine and balenine levels. Fig 5D-F display the proportion of methylated or acetylated  
 208 carnosine variants in different species and tissues.

209

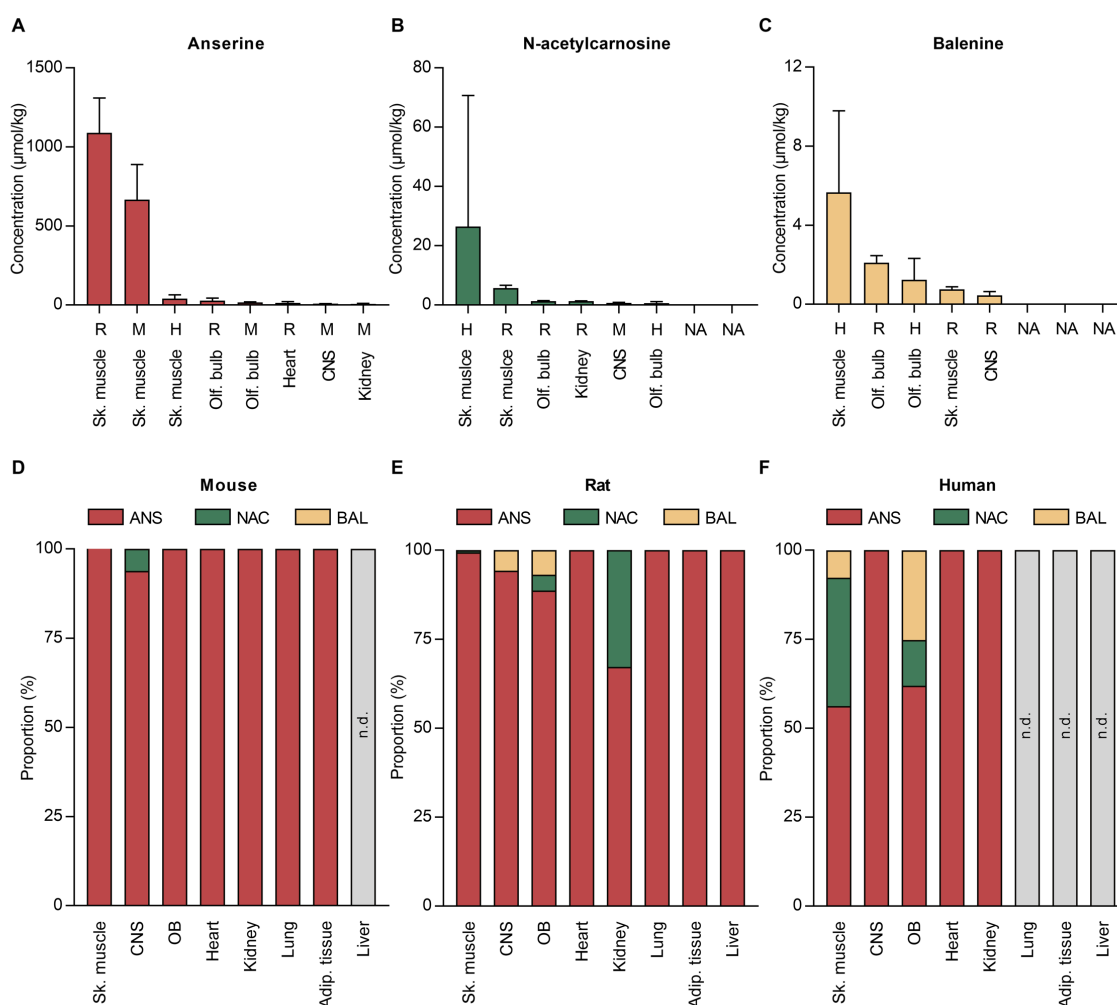

210

211 **Figure 5. Anserine, N-acetylcarnosine and balenine levels in mouse, rat and human tissues. (A)** Anserine, **(B)** N-  
 212 acetylcarnosine, and **(C)** balenine measurements by UHPLC-MS/MS in mouse (M), rat (R), and human (H) tissues. The  
 213 figures display the 8 tissues with the highest concentration of each dipeptide. Data are mean  $\pm$  SD. **(D-F)** Relative  
 214 proportion of anserine, N-acetylcarnosine, and balenine in **(D)** mouse, **(E)** rat, and **(F)** human tissues. Adip., adipose;  
 215 ANS, anserine; BAL, balenine; CNS, central nervous system; NAC, N-acetylcarnosine; n.d., not detectable; Olf. bulb,  
 216 olfactory bulb; Sk., skeletal.

217

218 Acetylation of carnosine provides stability in the human circulation, which is not required in red blood  
 219 cells or rodents

220 Since rodents and humans differ substantially in presence and activity of the hydrolyzing enzyme CN1  
 221 in the circulation (2, 10), we attempted to map the circulating content of the five main HCDs. As  
 222 expected, levels of plasma carnosine and anserine were very high in mice (~1500 nM) and rats (~3500  
 223 nM), but in the low nanomolar range in humans (**Fig 6A**). Low levels of homocarnosine could be  
 224 detected in all 3 species, while balenine was only present in human plasma (**Fig 6A**). Interestingly, N-  
 225 acetylcarnosine was the most abundant HCD in the human circulation, accounting for ~45% of the total  
 226 HCDs (**Fig 6B**). Although HCD levels in red blood cells (RBCs) were in the nanomolar range in all 3

227 species, striking differences were observed compared to plasma (**Fig 6A** and **6C**). For both rodent  
 228 species, HCD levels were drastically lower in RBCs than plasma (**Fig 6D** and **S3**). On the contrary, human  
 229 carnosine and anserine levels were higher in every RBC sample compared to plasma, whilst N-  
 230 acetylcarnosine levels were lower in RBCs than plasma (**Fig 6E**). These data suggest that carnosine in  
 231 the human circulation is rendered more stable via acetylation to N-acetylcarnosine (which is resistant  
 232 to hydrolysis by CN1) or via transport inside RBCs.

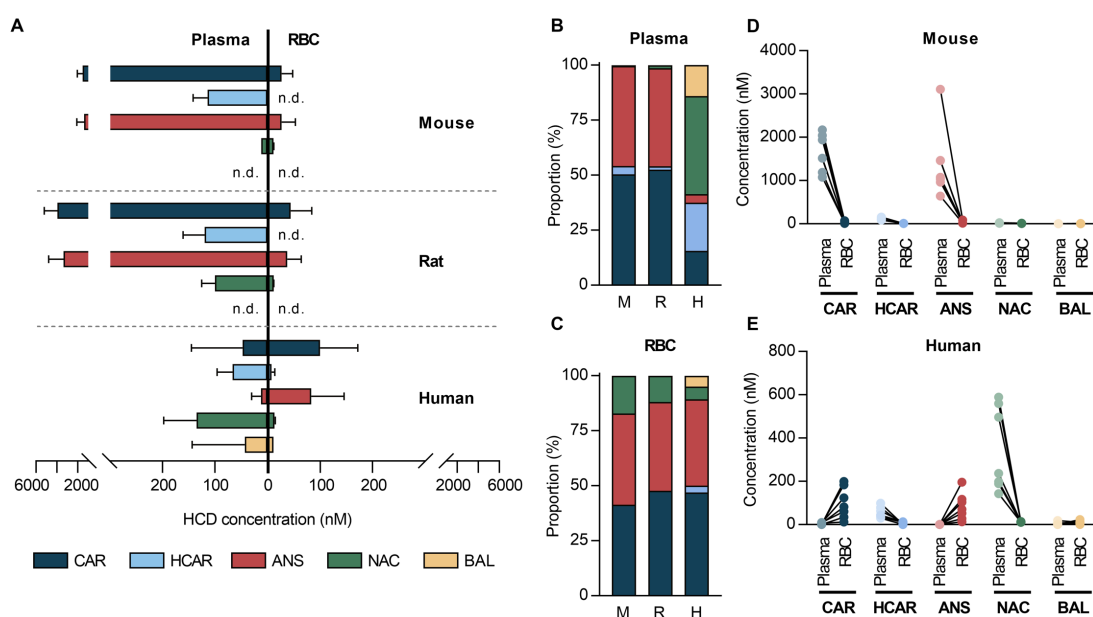

233  
 234 **Figure 6. Species differences in histidine-containing dipeptides in plasma and red blood cells. (A)** HCD measurements  
 235 by UHPLC-MS/MS in mouse, rat and human plasma and red blood cells (data are mean  $\pm$  SD). **(B)** Relative proportion of  
 236 each HCD in mouse (M), rat (R) and human (H) plasma. **(C)** Relative proportion of each HCD in mouse, rat and human  
 237 red blood cells. **(D)** Direct comparison of HCDs in plasma and red blood cells collected from the same mice. **(E)** Direct  
 238 comparison of HCDs in plasma and red blood cells collected from the same human individuals. ANS, anserine; BAL,  
 239 balenine; CAR, carnosine; HCAR, homocarnosine; NAC, N-acetylcarnosine; RBC, red blood cells.

240  
 241 Oral  $\beta$ -alanine supplementation affects HCDs in skeletal muscle and circulating N-acetylcarnosine  
 242 levels in humans

243 We next investigated the effects of chronic supplementation of the rate-limiting precursor  $\beta$ -alanine  
 244 on the content of all five HCDs in human skeletal muscle. As expected,  $\beta$ -alanine supplementation  
 245 increased muscle carnosine content (+89%, **Fig 7A** and **S4A**). In addition, we observed increases in  
 246 muscle anserine (+38%, **Fig 7A** and **S4B**), N-acetylcarnosine (+97%, **Fig 7A** and **S4C**) and balenine  
 247 (+199%, **Fig 7A** and **S4D**), and these increases were proportional to the carnosine increase (**Fig 7B**).  
 248 However, homocarnosine content significantly decreased (-50%) after 12 weeks of  $\beta$ -alanine  
 249 supplementation (**Fig 7A** and **S4E**). Plasma N-acetylcarnosine increased by 48% after the  
 250 supplementation period (**Fig 7A** and **S4E**), which correlated at the individual level with muscle

251 carnosine content (**Fig 7C**), suggesting a possible link between intramuscular and circulating HCD levels.  
252 In summary, oral  $\beta$ -alanine supplementation is a potent stimulus affecting all HCDs in skeletal muscle,  
253 and plasma N-acetylcarnosine may reflect muscle HCD levels under baseline conditions and during  $\beta$ -  
254 alanine supplementation.

255

#### 256 N-acetylcarnosine is released from human skeletal muscle during exercise

257 Given this likely relationship between intra- and extracellular HCDs, and given that skeletal muscle is  
258 the main active organ during exercise, we explored HCD dynamics during exercise. First, we collected  
259 muscle interstitial fluid at rest and during exercise in humans. During exercise, interstitial levels for  
260 every HCD increased (**Fig 7D**). This increase could however be primarily caused by sarcolemmal  
261 damage following insertion of the microdialysis probe (19). To check this, we performed two follow-  
262 up experiments. Firstly, *in vitro* human primary muscle cells were electrically stimulated for 2-3 h to  
263 simulate muscle contraction. This did not result in secretion of carnosine into the culture medium  
264 immediately after the electrical stimulation or following 30 min recovery (**Fig 7E**). Other HCDs could  
265 not be detected in the cell culture medium. Secondly, we collected interstitial fluid from mouse skeletal  
266 muscle, with a previously published method in which the muscle is not mechanically affected (20, 21).  
267 Interstitial levels of carnosine and anserine were not higher in exercised mice compared to control  
268 mice (**Fig S5A**). Next, we collected samples of the femoral artery and vein at rest and during exercise  
269 (from a group of postmenopausal women). Our results clearly indicate a release of N-acetylcarnosine  
270 from muscle tissue at rest of  $\sim 13$  nmol/min (from one leg), which further increased  $\sim 2$ -fold during  
271 exercise (**Fig 7F**). No release at rest or during exercise was observed for any of the other HCDs (**Fig 7F**).  
272 These results were confirmed using a similar experimental setup in healthy young men, and with more  
273 sampling time points during rest, passive movement, exercise and recovery. Here, we again showed a  
274 release of N-acetylcarnosine at rest ( $\sim 14$  nmol/min from one leg), which increased 3.4-fold during  
275 exercise and quickly returned back to baseline during recovery (**Fig 7G**). Exercise did not induce  
276 carnosine release or uptake within RBCs (**Fig S5B**). Also in mice, no changes in carnosine or anserine  
277 levels within plasma were observed following 60 min exercise (**Fig S5C**). Taken together, these data  
278 indicate that N-acetylcarnosine in humans is likely the major, or most stable, HCD released during  
279 exercise in a myokine-like fashion.

280

281

282

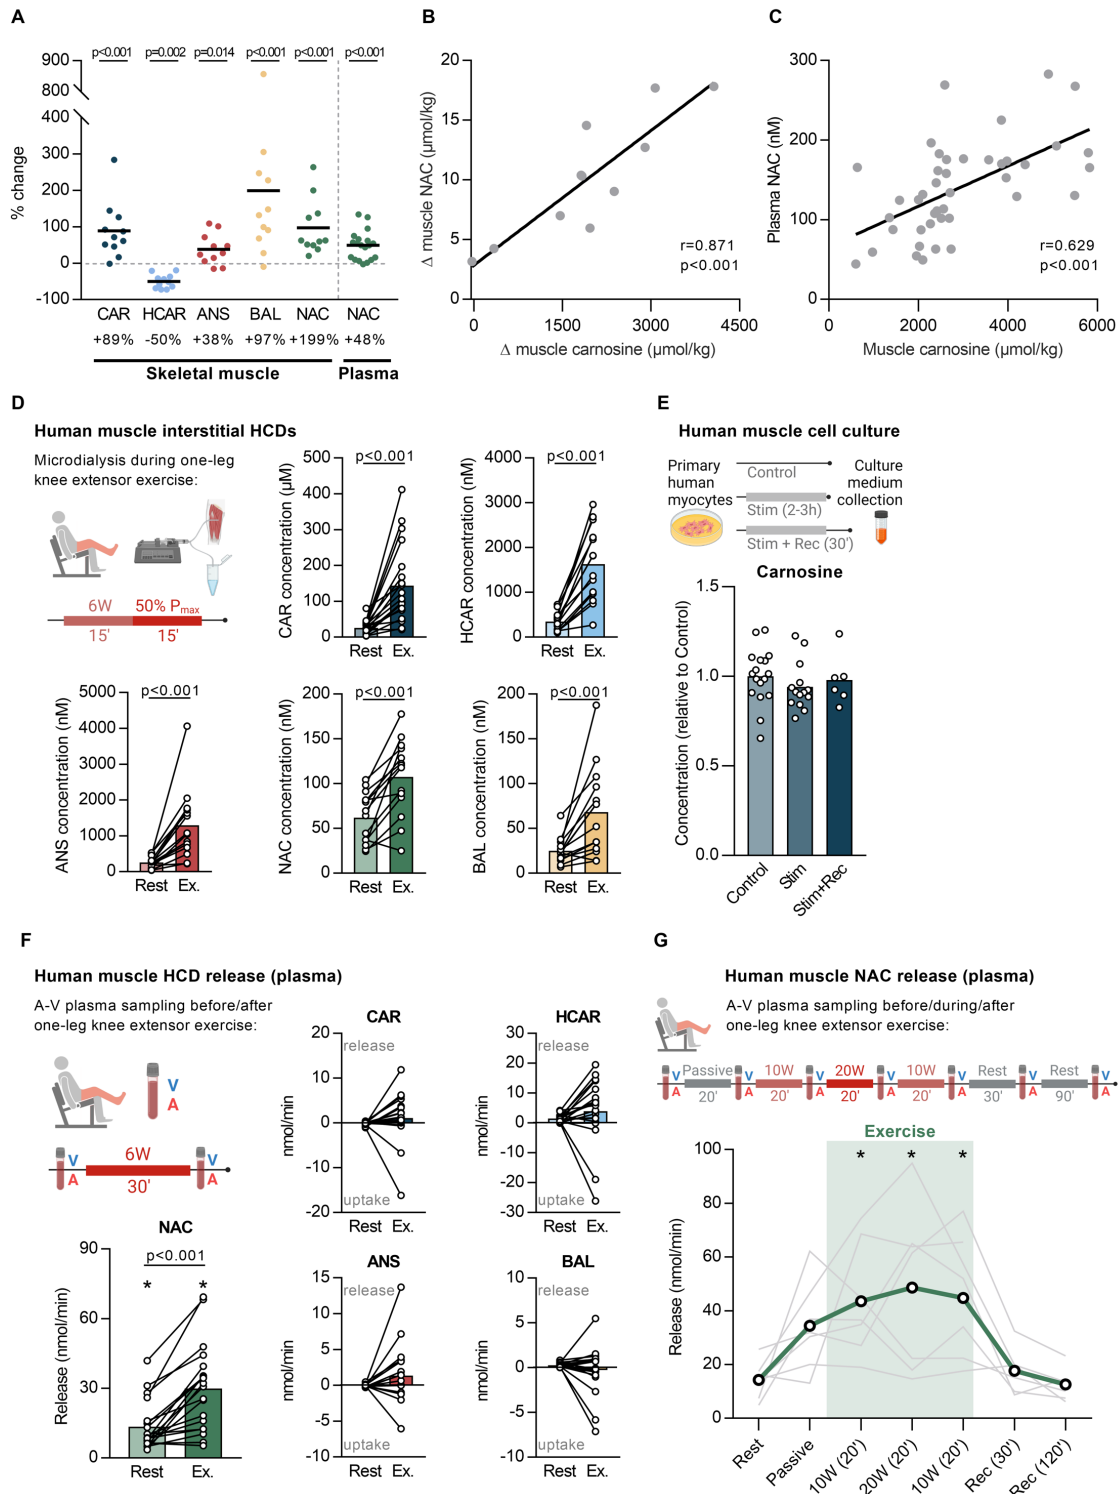

283

284 **Figure 7.  $\beta$ -alanine supplementation and N-acetylcarnosine release during exercise from human muscle. (A) Changes**  
 285 **in HCD levels, measured by UHPLC-MS/MS, in human skeletal muscle (m. vastus lateralis) after  $\beta$ -alanine**  
 286 **supplementation. (B) Correlation between supplementation-induced changes in skeletal muscle carnosine and N-**  
 287 **acetylcarnosine, measured by UHPLC-MS/MS. (C) Correlation between skeletal muscle carnosine and plasma N-**  
 288 **acetylcarnosine, measured by UHPLC-MS/MS. (D) HCD measurements by UHPLC-MS/MS in human skeletal**  
 289 **muscle interstitial fluid at rest and following exercise (Ex.). (E) Carnosine measurements by UHPLC-MS/MS in**  
 290 **culture medium from primary human muscle cells in control condition, after 2-3 h of electrical stimulation (Stim),**  
 291 **and after 2-3 h of electrical stimulation followed by 30 min recovery (Stim+Rec). (F) HCD measurements by UHPLC-MS/MS**  
 292 **in human arterial and venous plasma samples at rest and following exercise (Ex.). Positive values indicate a net release, negative**

293 values indicate a net uptake. Asterisk indicates significantly different from zero release at the respective time point. **(G)**  
294 Release of N-acetylcarnosine in human plasma, based on arterio-venous differences, at rest, during passive movement,  
295 at different time points during exercise, and up to 120 min recovery (Rec). Positive values indicate a net release, negative  
296 values indicate a net uptake. ANS, anserine; A-V; arterio-venous, BAL, balenine; CAR, carnosine; HCAR, homocarnosine;  
297 NAC, N-acetylcarnosine.

298

## 299 Discussion

300 This is the first study to systematically and extensively profile the organ distribution of HCDs and their  
301 differences between mice, rats and humans. Although present in all investigated non-excitable tissues  
302 in minute amounts, mainly excitable tissues contained high HCD levels in all species. Yet, our data show  
303 surprisingly low values in cardiac tissue across species, and a different distribution of HCDs in CNS  
304 regions between species. The enzyme CARNS1 is the unique enzyme responsible for endogenous  
305 carnosine and homocarnosine synthesis, and is a major determinant for tissue HCD levels. In human  
306 CNS white matter, CARNS1 appears restricted to cells from the oligodendrocyte lineage. We also  
307 uncover that N-acetylcarnosine is the primary circulating HCD in human plasma and is continuously  
308 secreted from skeletal muscle into the circulation, which is further increased by physical exercise. An  
309 overview of the main findings is visualized in **Fig 8**.

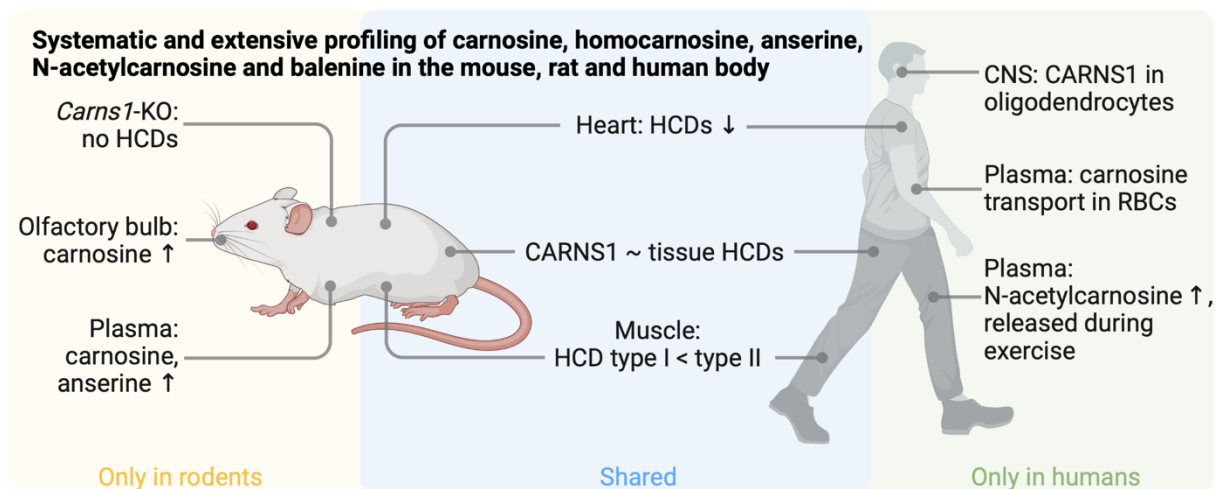

310 **Figure 8. Graphical summary.** Visual representation of the main findings, based on our extensive profiling of histidine-  
311 containing dipeptides (HCDs) in mice, rats and humans, and related follow-up experiments. Arrow up indicates high  
312 abundance, arrow down indicates low abundance. CNS, central nervous system; RBC, red blood cell.

313

314 Previous endeavors to profile HCDs mostly focused on rodent tissues, and resulted in fragmented and  
315 sometimes contradictory literature (13, 22-25). Our systematic approach and very sensitive state-of-  
316 the-art UHPLC-MS/MS methodology facilitate direct comparison between tissues and species. Our  
317 data contradicted some of the previous findings, e.g. that human muscle contains only carnosine and  
318 no other HCDs (2), that rat kidney, lung, plasma and liver lack HCDs (13), or that homocarnosine is

319 exclusively found in the CNS (26), with no presence of carnosine in the human brain or cerebrospinal  
320 fluid (27). We confirmed that anserine is predominantly found in rodent skeletal muscles (2, 16), but  
321 add that N-acetylcarnosine and balenine were primarily enriched in human skeletal muscles, although  
322 still lower than anserine and (homo)carnosine. From our systematic approach, we calculate that 99.1%  
323 of the total amount of HCDs in the human body is found in skeletal muscle tissue, which confirms  
324 previous estimations (28). Moreover, HCD concentrations in the present study are often different than  
325 those previously reported. More specifically, we report lower HCD concentrations in human skeletal  
326 muscle than previous studies (29-31). This is most likely explained by the use of tissue-specific *Carns1*-  
327 KO tissue matrix for our quantification method, which is known to be important for MS-based  
328 quantification (32). Furthermore, Peters *et al.* reported very high carnosine (1800  $\mu\text{mol/kg}$ ) and  
329 anserine (4000  $\mu\text{mol/kg}$ ) concentrations in human kidney (23), which are approximately 1000-fold  
330 higher than the concentrations in our dataset ( $\sim 2 \mu\text{mol/kg}$ ). Besides the use of a different detection  
331 technique and quantification method, it is unclear where such differences may have originated from.

332 CARNS1 and HCDs, especially carnosine, have long been recognised as enriched compounds within the  
333 olfactory tract of rodents (33, 34). In human olfactory bulbs, we found remarkably low levels of  
334 carnosine compared to homocarnosine. In addition, this is the first study to unequivocally ascribe  
335 CARNS1 expression to a specific cell type within the CNS; outside of the olfactory bulb. Our discovery  
336 of CARNS1 localisation within cells of the oligodendrocyte lineage (human white matter) confirms  
337 suggestions from recent RNA sequencing databases of the mouse and human CNS that reported  
338 *Carns1/CARNS1* as an oligodendrocyte-enriched gene (35, 36).

339 Traditionally, the highest HCD levels are assigned to the excitable tissues. Though this holds true with  
340 respect to skeletal muscle and CNS tissue, it was quite compelling that we found extremely low  
341 amounts of HCDs in cardiac muscle tissue. In contrast to previous suggestions that the rat heart  
342 contains  $\sim 10 \text{ mM}$  HCDs (37), we report 100-fold lower levels. This was consistently found in all three  
343 species we investigated, and is also 50- to 100-fold lower compared to the concentrations in skeletal  
344 muscle. This can potentially be attributed to more accurate and sensitive quantification compared to  
345 the older technology. Nevertheless, HCDs are thought to play a crucial role in cardiac function and  
346 recovery from injury (12, 38). For instance, isolated cardiac myocytes from *Carns1*-transgenic hearts  
347 were protected against hypoxia reoxygenation injury (39), whilst *Carns1*-KO rats have impaired cardiac  
348 contractility accompanied by reduced  $\text{Ca}^{2+}$  peaks and slowed  $\text{Ca}^{2+}$  removal (40). This underscores the  
349 physiological importance of HCDs and indicates that even low HCD levels can contribute significantly  
350 to cell/organ function and health. It remains to be determined, however, which biochemical properties  
351 and physiological roles of these pleiotropic molecules are the most important in different tissues and  
352 under different conditions. With respect to cardiomyocytes, it has been proposed that carnosine

353 functions as a  $\text{Ca}^{2+}/\text{H}^{+}$  exchanger to shuttle calcium towards and protons away from the sarcomere site  
354 (41, 42).

355 The parent HCDs carnosine and homocarnosine share the same synthesizing enzyme CARNS1. This also  
356 underlies our observation that oral  $\beta$ -alanine intake leads to increased carnosine but reduced  
357 homocarnosine levels in human muscle, implying substrate inhibition between GABA and  $\beta$ -alanine for  
358 CARNS1. Additionally, high expression of CARNS1 can lead to high tissue content of either carnosine  
359 or homocarnosine, probably dependent of the local precursor availability (GABA vs.  $\beta$ -alanine). *Carns1*-  
360 KO mice did not produce HCDs, whereas in WT mice, rats and humans, there appears to be a  
361 relationship between CARNS1 expression and HCD content on a whole-body level. Moreover, the  
362 differences in HCD content between slow- and fast-twitch muscle fibers were paralleled by similar  
363 differences in CARNS1 expression. However, the correlation between CARNS1 expression and HCD  
364 content was not perfect, suggesting that there might be inter-organ exchange or that there is higher  
365 HCD turnover in tissues that have an important role for carnosine consumption/recycling, for example  
366 through oxidative stress and reactions with toxic metabolites in pathological conditions (8).  
367 Alternatively, the fact that CARNS1 shows a preference for  $\beta$ -alanine compared to GABA as a substrate  
368 may skew this relationship considering that some tissues contain more carnosine than homocarnosine  
369 and vice versa (11).

370 Tissues that have no or minimal CARNS1 expression likely rely on transmembrane uptake of HCDs  
371 derived from exogenous/dietary sources or from production in CARNS1-expressing organs. It has  
372 remained unclear, however, if and how HCDs are transported between tissues. The detection of HCDs  
373 in various rodent and human tissues likely illustrates that HCDs can be exchanged between organs with  
374 and without synthesizing capacity. Indeed, mice that lack the carnosine transporter PEPT2 have altered  
375 (mostly reduced) HCD levels in various organs but increased levels in skeletal muscle tissue, which is  
376 capable of synthesizing carnosine itself (22). This issue remains largely unclear in humans, in which  
377 high activity of the CN1 enzyme quickly degrades circulating carnosine (2). It has long been suggested  
378 that circulating HCDs are extremely low or absent in human plasma (43-45), although more recent  
379 reports already detected carnosine (46, 47). We now demonstrate that N-acetylcarnosine is the most  
380 stable carnosine analog in plasma, indicating that acetylation of the  $\beta$ -alanine residue protects against  
381 the hydrolyzing activity of CN1. Thus, N-acetylcarnosine may be the primary HCD that is exchanged  
382 between tissues in humans. Interestingly, plasma N-acetylcarnosine levels were correlated to muscle  
383 carnosine (and N-acetylcarnosine) levels, possibly indicating that plasma N-acetylcarnosine can serve  
384 as a surrogate marker for intramuscular HCD levels. Plasma N-acetylcarnosine levels increased  
385 following  $\beta$ -alanine intake, showing that circulating N-acetylcarnosine levels may also be a marker for  
386 muscle carnosine/HCD loading. In addition, our data indicate that transport of carnosine in RBCs is an



387 alternative strategy to protect against CN1 in human plasma, as recently suggested (48). This was not  
388 true for rodents, who had lower HCD levels in RBCs than humans, despite more than 25 times higher  
389 plasma HCD levels.

390 It has been proposed that carnosine is released from muscles during periods of contractile activity,  
391 potentially serving as a health-promoting myokine. This hypothesis is primarily based on a study in  
392 rats, where plasma carnosine levels increased during the dark/active phase when animals were  
393 provided with a running wheel (49). We report that in humans, N-acetylcarnosine is the only HCD that  
394 is consistently released from muscle tissue into plasma at rest, which is further increased during  
395 periods of muscular activity (exercise). This opens various new research avenues on N-acetylcarnosine  
396 as an exercise-induced myokine (50, 51). Future experiments should determine its relevance for  
397 exercise training adaptations and cell/organ crosstalk (52). The average N-acetylcarnosine release of  
398 14.3 nmol/min from non-contracting leg muscles at rest is striking. Extrapolation of this release to the  
399 whole body, assuming that all muscles have the same N-acetylcarnosine secretion, suggests that in  
400 theory the blood N-acetylcarnosine concentration should increase by 23.9  $\mu$ M every 24 hours. Despite  
401 this continuous and substantial release of N-acetylcarnosine into the circulation, resting plasma N-  
402 acetylcarnosine levels only reach 50-350 nM in most subjects, indicating that there is a large  
403 uptake/utilization of N-acetylcarnosine in other organs, or urinary excretion. Based on the amount of  
404 N-acetylcarnosine release measured in arterio-venous samples from the leg, we also estimated that a  
405 daily turnover of 25% of the total muscle N-acetylcarnosine pool is needed to maintain stable muscle  
406 N-acetylcarnosine levels, suggesting a rather dynamic HCD homeostasis in human muscle. Specific  
407 description of these calculations and used assumptions can be found in the **Supplementary Text**. In  
408 muscle interstitial fluid samples, all HCDs appear to increase during exercise. However, it is hard to  
409 distinguish physiological exercise-induced release from sarcolemmal rupture caused by insertion of  
410 the microdialysis probes (19), as also supported by (I) the absence of a carnosine release during  
411 electrical stimulation of primary human muscle cells or interstitial fluid sampled from mice post-  
412 exercise, and (II) the lack of other HCD release (besides N-acetylcarnosine) in the venous effluent of  
413 contracting muscles.

414 Despite being the first study to systematically and extensively study the distribution of HCDs in three  
415 species, we acknowledge that the mouse and rat data cannot be fully extrapolated to all mouse and  
416 rat strains, since these can differ somewhat (53). We also decided to focus on the two parent HCDs  
417 (carnosine and homocarnosine) and carnosine's methylated and acetylated analogs (anserine,  
418 balenine, N-acetylcarnosine). Other HCD conjugates do exist, but these are mostly very low abundant  
419 products from reactions with other (toxic) compounds (e.g. carnosine-propanol or 2-oxo-carnosine  
420 (54-56)).

421 In conclusion, we extensively profiled the organ distribution of the five main HCDs and discovered new  
422 physiological routes of HCD metabolism. Our results can be used to generate various new research  
423 hypotheses and highlight that findings derived from animal research on HCDs can not always be  
424 translated to humans. In particular, the apparent inter-cell and inter-tissue para- and endocrine  
425 regulation of HCDs, as well as its relevance to human health, disease and exercise  
426 performance/adaptation, deserve further investigation.

427

## 428 **Materials and methods**

### 429 HCD profiling - Rodent tissue collection

430 All mouse tissues were obtained from an in-house breeding of *Carns1*-KO and WT mice with a C57/BL6  
431 background, kindly provided by Prof. M. Eckhardt (14, 57). Genotypes of the offspring from  
432 heterozygous parents were determined in toe samples using a previously published protocol (14).  
433 Wistar rats were supplied by Envigo (The Netherlands). Mice and rats were housed under standard  
434 room conditions (12h:12h light:dark cycle, 20-24°C, relative humidity 30-60%) and had *ad libitum*  
435 access to drinking water and food pellets. For tissue collection, female and male animals were  
436 sacrificed at an age of 6-10 w (mice) or 7-8 w (rats) old. Following overdose injection of Dolethal  
437 (200 mg/kg, i.p.), blood was collected from the right ventricle, kept in Multivette® 600 K3 EDTA vials  
438 on ice, centrifuged (5 min, 3500 rpm), and plasma was stored at -80°C. Before tissue dissection, mice  
439 and rats were perfused with 0.9% NaCl solution containing heparin (25 UI/mL) via a left ventricular  
440 puncture. For determination of HCD levels by UHPLC-MS/MS and *CARNS1* expression by Western blot,  
441 tissues were immediately frozen in liquid nitrogen, before being stored at -80°C. For  
442 immunohistochemistry, whole mouse brains were carefully placed on a metal plate cooled by dry ice  
443 in a foam box for several minutes, wrapped in aluminum foil, and stored at -80°C. Mouse exercise  
444 experiments were performed on a treadmill (6 m/min, speed increased every 2 min by 2 m/min until  
445 16 m/min, total duration 60 min), and were preceded by a 1-week adaptation period (3 running  
446 sessions, gradually increasing exercise intensity and duration). Sedentary mice were placed on a  
447 stationary treadmill for 60 min. Immediately after exercise, plasma was obtained and mice were  
448 perfused as described above. To collect interstitial fluid, gastrocnemius muscles were placed on 20 µM  
449 nylon net filters (Millipore, cat# NY2004700) and centrifuged (10 min, 800 × g) (20, 21). All animal  
450 procedures were approved by the Ethical Committee on Animal Experiments at Hasselt University  
451 (202074B, 202127 and 202145).

452 HCD profiling - Human tissue collection

453 All human samples were obtained after written informed consent.

454 **Human vastus lateralis muscle:** Muscle biopsies were collected from the m. vastus lateralis of healthy,  
455 young volunteers using the Bergström needle biopsy technique with suction, as described previously  
456 (58). One part of the samples was immediately snap-frozen in liquid nitrogen and stored at -80°C until  
457 UHPLC-MS/MS analysis. The other part was submerged in 1-1.5 mL of *RNAlater* (Thermo Fisher  
458 Scientific), stored at 4°C for maximum 48 h and subsequently stored at -80°C for later individual fiber  
459 dissection.

460 **Human heart and pectoralis muscle:** Heart and pectoralis muscle samples were collected from  
461 patients undergoing open heart surgery under general anaesthesia. Heart samples consisted of the  
462 right atrial appendage, harvested at the time of venous drainage cannulation for cardiopulmonary  
463 bypass. Samples were immediately snap-frozen in liquid nitrogen and stored at -80°C. For **Fig 1F**, HCD  
464 concentrations of vastus lateralis and pectoralis muscle were averaged.

465 **Human kidney:** Kidney samples were collected from patients undergoing radical nephrectomy. In case  
466 of kidney cancer, tissue was sampled as far away from the site of the tumor to obtain the healthiest  
467 part of the kidney, immediately snap-frozen in liquid nitrogen and stored at -80°C. Medulla and cortex  
468 were sampled separately (**Table S1**), but data was later averaged for analysis and visualization.

469 **Human adipose tissue:** Visceral and subcutaneous adipose tissue were sampled from lean and obese  
470 individuals during abdominal surgery following an overnight fast (59). Tissue pieces were rinsed, freed  
471 from visible blood and connective tissue, and snap-frozen in liquid nitrogen. The two subtypes (**Table**  
472 **S1**) were later averaged for analysis and visualization.

473 **Human lung:** Lung tissue was obtained from unused healthy donor lungs that were not used for  
474 transplantation from the BREATH KULeuven biobank (S51577).

475 **Human liver:** Liver samples were surgically removed from fasted subjects with obesity during gastric  
476 bypass surgery. Exclusion criteria were the presence of malignancies, drinking more than two units  
477 (women) or three units (men) of alcohol per day, having known liver pathologies other than non-  
478 alcoholic fatty liver disease. For the current analysis, five samples with NAS score 0 or 1 were selected  
479 (60).

480 **Human plasma and RBC:** Blood samples were always collected in pre-cooled EDTA tubes, after a 1-2-  
481 day lacto-ovo vegetarian diet to ensure no influence of dietary HCD intake. For plasma, samples were  
482 immediately centrifuged (10 min, 3000 × g, 4°C), followed by immediate deproteinization (110 µL of

483 35% 5-sulfosalicylic acid per 1 mL of plasma) and second centrifugation (5 min, 15000 × g, 4°C). Plasma  
484 samples were then stored at -80°C. For RBC isolation (61), blood tubes were centrifuged for 15 min at  
485 120 × g at room temperature. Plasma was carefully removed and 200 μL RBCs were collected in 1.8 mL  
486 of ice-cold methanol (55% v/v). Samples were then stored at -80°C.

487 **Human CNS:** Seven different human CNS regions were obtained from The Netherlands Brain Bank  
488 (NBB), Netherlands Institute for Neuroscience, Amsterdam (open access [www.brainbank.nl](http://www.brainbank.nl)). All  
489 donors were ‘non-demented controls’, indicating the absence of neurological and psychiatric disease.  
490 From 2 subjects, all 7 regions were available. For immunohistochemical analyses, white matter tissue  
491 from healthy controls and unaffected white matter tissue of multiple sclerosis patients from a previous  
492 study was used.

493 **Human cerebrospinal fluid:** Cerebrospinal fluid from subjects without neurological disease at the time  
494 of sampling was obtained via the University Biobank Limburg (UbiLim), with approval from the Medical  
495 Ethics Committee at Hasselt University (CME2021-004). Lumbar cerebrospinal fluid was collected into  
496 PPS tubes, kept at 4°C, centrifuged to remove cells (10 min, 500 × g, 4°C), and supernatant was stored  
497 at -80°C.

498

#### 499 β-alanine supplementation study in humans

500 Vastus lateralis muscle biopsies obtained via the Bergström needle biopsy technique with suction  
501 (n=11 β-alanine, n=11 placebo) and plasma samples (n=19 β-alanine, n=17 placebo) were collected  
502 before and after 12 weeks of β-alanine supplementation in patients with COPD (sustained-release  
503 CarnoSyn®, NAI). Methodological details have been described previously (62). Snap-frozen biopsies  
504 were freeze-dried for 48 h, followed by manual removal of non-muscle material (fat, connective tissue,  
505 blood) under a light microscope. Effects of β-alanine were analyzed using a two-way repeated  
506 measures ANOVA (group vs. time) for each HCD separately, followed by Sidak’s multiple comparisons  
507 tests. Correlations were performed using Pearson correlation ( $\Delta$  muscle carnosine vs.  $\Delta$  N-  
508 acetylcarnosine) or Spearman rank correlation (muscle carnosine vs. plasma N-acetylcarnosine).

509

#### 510 Human HCD release experiments

511 **Microdialysis experiment:** Detailed methodology has been described previously (63). In short,  
512 interstitial samples from m. vastus lateralis were collected using the microdialysis technique at rest  
513 and after 30 min of one-legged knee extensor exercise (15 min 6 W, 15 min 50% peak power). Subjects

514 consisted of a group of young (n=7) and old (n=13) healthy men (results are pooled together since no  
515 differences between groups could be observed). Concentrations were corrected for probe recovery as  
516 determined by relative loss of [2-<sup>3</sup>H]-labeled adenosine in the dialysate. Interstitial levels during  
517 exercise were compared to resting values using a multiple Wilcoxon matched-pairs signed rank test  
518 with Holm-Sidak multiple comparison test.

519 **Arterio-venous balance experiment 1:** Arterial and venous samples were collected from the femoral  
520 artery/vein at rest and after 30min one-legged knee extensor exercise (6W) in a group of healthy  
521 postmenopausal women (n=19). Methodological details can be found in (64). Samples were  
522 deproteinized with 35% 5-sulfosalicylic acid, as described above, on the day of the UHPLC-MS/MS  
523 analysis. Exercise vs. resting HCD levels were compared using a multiple Wilcoxon matched-pairs  
524 signed rank test with Holm-Sidak multiple comparison test.

525 **Arterio-venous balance experiment 2:** Seven healthy, young men ( $28 \pm 4$  years old, BMI of  $24 \pm 2$ ,  
526  $VO_{2max}$  of  $49 \pm 7$  mL/min/kg) participated in this experiment. After passive transport to the lab,  
527 catheters were inserted in the femoral artery and vein. Next, arterial and venous samples were  
528 collected every 30 min during a 90 min supine resting period. After this, 20 min of passive leg  
529 movement was performed, followed by 60 min of active one-legged knee extensor exercise (20 min 10  
530 W, 20 min 20 W, 20 min 10 W). Samples were collected at the end of each exercise bout. Finally,  
531 arterio-venous samples were collected after 30 min and 2 h of recovery. Plasma and RBC samples were  
532 collected as described above. Exercise-induced effects were analyzed using a mixed-effect model with  
533 repeated measurements over time, with post-hoc comparison of every time point vs. baseline (Holm-  
534 Sidak test).

535

### 536 Primary cell culture experiments

537 Biopsy samples (~150 mg) were obtained from m. vastus lateralis from young, healthy men. Primary  
538 skeletal muscle cells were isolated with homemade antibody-coated magnetic beads and cultured as  
539 previously described (65, 66). Cultured skeletal muscle cells were used for analysis on day 5 or 6 after  
540 the onset of differentiation. At this time, most of the myocytes have differentiated into multinucleated  
541 myotubes and can easily be identified as muscle cells. Myotubes were starved with media containing  
542 0.1% Bovine Serum Albumin (DMEM without phenol, D-glucose and L-glutamine) for 16 hours before  
543 experiments. The skeletal muscle cells were electro-stimulated as described previously (67), with the  
544 minor addition of 5 $\mu$ M (S)-nitro-Blebbistatin (Cayman Chemical, CAS. 856925-75-2) to the stimulation  
545 buffer to inhibit the spontaneous contraction of the myotubes (68). The cells were stimulated for 2-3  
546 h (50 Hz, 0.6s/0.4 s trains, 1 ms pulse width, 10 V, homemade electrical stimulator connected to a

547 Digitimer MultiStim SYSTEM-D330). The extracellular medium was collected immediately or 30 min  
548 after the end of stimulation, and medium from non-stimulated control cells was harvested  
549 simultaneously. Changes over time were analyzed using a mixed-effect model with repeated  
550 measurements over time, with post-hoc comparison of stimulated and stimulated+recovery vs. control  
551 cells (Holm-Sidak test).

552

#### 553 HCD determination by UHPLC-MS/MS

554 Details of the validation of the in-house developed UHPLC-MS/MS analysis has been described  
555 previously (69), with the exception that all experiments were performed on a Xevo® TQ-S MS/MS  
556 system with 2.5 µL injection volume. The limit of detection was determined to be 5-10 nM (in plasma),  
557 corresponding to 0.38-0.76 µmol/kg tissue for our homogenization protocol. Pure carnosine and  
558 anserine were kindly provided by Flamma S.p.a. (Chignolo d'Isola, Bergamo, Italy), and pure balenine  
559 by NNB Nutrition (Frisco, Texas, USA). Homocarnosine (#33695) and N-acetyl-L-carnosine (#18817)  
560 were bought from Cayman Chemical (Ann Arbor, Michigan, USA). UHPLC-MS/MS data extraction and  
561 analysis was performed using Masslynx software 4.2 (Waters, Milford, USA).

562 **Tissues:** All tissues were prepared similarly, based on the method described previously (8). Frozen  
563 tissues were quickly weighed and immediately homogenized in extraction solution (ultrapure water  
564 with 10 mM HCl and internal standard carnosine-d4) in a ratio of 95 µL extraction solution per 5 mg  
565 tissue in a QIAGEN TissueLyser II (1 min, 30 Hz). The concentration of carnosine-d4 varied according to  
566 expected HCD concentrations in the tissues: muscle (20 µM), CNS (5 µM), liver/lung/spleen (0.5 µM)  
567 and all other tissues (1 µM). Then, homogenates were centrifuged (20 min, 3000 × g, 4°C).  
568 Supernatants were immediately diluted in a 3:1 ratio with ice-cold acetonitrile (-20°C), vortexed and  
569 kept on ice for 15min. After a second centrifugation step (20 min, 3000 × g, 4°C), samples were stored  
570 at -80°C until the day of the UHPLC-MS/MS analysis. Samples were combined with 75:25  
571 acetonitrile:water in a 4:1 ratio before injection in the UHPLC-MS/MS device. For skeletal muscle and  
572 CNS, samples were also injected after an extra initial dilution (1:25 for muscle, 1:10 for CNS) for the  
573 determination of carnosine (skeletal muscle) and homocarnosine (CNS) content. Standard calibration  
574 curves were prepared for each individual run and for each tissue separately in the respective tissue of  
575 the *Carns1*-KO mice to account for possible tissue matrix effects (for all three species). Differences  
576 between soleus and EDL HCD levels in mice and rats were analyzed using paired t-tests or Wilcoxon  
577 signed-rank tests, depending on normality of the data.

578 **Plasma:** Deproteinized plasma (150 µL) was combined with acetonitrile containing 1% formic acid (215  
579 µL), 1 µM carnosine-d4 as internal standard (10 µL) and ultrapure water (25 µL). For mouse plasma

580 analysis, volumes were scaled down to available plasma (75  $\mu$ L). After thoroughly vortexing, samples  
581 were centrifuged (15 min, 15000  $\times$  g, 4°C). The supernatant was collected and injected in the UHPLC-  
582 MS/MS. A standard calibration curve was prepared in a pool of human deproteinized plasma that was  
583 collected after a 2-day lacto-ovo vegetarian diet to minimize circulating HCDs (for all three species).

584 **RBC:** First, 190  $\mu$ L of the RBC samples was combined with 10  $\mu$ L of internal standard carnosine-d4  
585 (2 $\mu$ M) and 10  $\mu$ L of 75:25 acetonitrile:water (with 1% formic acid). This mixture was vortexed and then  
586 centrifuged in a 10 kDa filter (Nanosep® Centrifugal Device with Omega Membrane™, Pall  
587 Corporation). The supernatant was subsequently evaporated at 40°C and the droplet resuspended in  
588 40  $\mu$ L of 75:25 acetonitrile:water (with 1% formic acid) before injection in the UHPLC-MS/MS device.  
589 A standard calibration curve was prepared in a pool of human RBC samples that were collected after a  
590 2-day lacto-ovo vegetarian diet to minimize circulating HCDs (for all three species).

591 **Cerebrospinal fluid:** Human cerebrospinal fluid was treated identically as plasma, but the standard  
592 calibration curve was prepared in ultrapure water since no *Carns1*-KO tissue matrix was available,  
593 possibly resulting in overestimation of the absolute concentrations.

594 **Interstitial fluid:** Interstitial fluid (15  $\mu$ L) was combined with 30  $\mu$ L acetonitrile containing 1% formic  
595 acid and 1  $\mu$ M carnosine-d4 and 10  $\mu$ L ultrapure water. This mixture was vortexed, centrifuged (15  
596 min, 15000  $\times$  g, 4°C) and the supernatant was used to inject in the UHPLC-MS/MS. For detection of  
597 carnosine in humans, samples were first diluted 1:30. For detection of carnosine and anserine in mice,  
598 samples were first diluted 1:500. A standard calibration curve was prepared in Ringer-Acetate buffer  
599 as this was used to perfuse the microdialysis probes.

600 **Cell culture medium:** Extracellular medium (150  $\mu$ L) was mixed with acetonitrile containing 1% formic  
601 acid (240  $\mu$ L) and internal standard carnosine-d4 (2  $\mu$ M, 10  $\mu$ L), vortexed and injected in the UHPLC-  
602 MS/MS. A standard calibration curve was prepared in DMEM culture medium.

603

#### 604 CARNS1 protein levels by Western blot

605 Tissues were diluted in RIPA buffer (300  $\mu$ L per 10 mg tissue; 50 mM Tris pH 8.0, 150 mM NaCl, 0.5%  
606 sodium deoxycholate, 0.1% SDS, 1% Triton-X100, and freshly added protease/phosphatase inhibitors  
607 [Roche]), and homogenized using stainless steel beads and a QIAGEN TissueLyser II (shaking 1 min, 30  
608 Hz). Following centrifugation (15 min, 12000  $\times$  g, 4°C), supernatants were stored at -80°C. Pierce™ BCA  
609 Protein Assay Kit (Thermo Fisher) was used according to manufacturer's instructions to determine  
610 protein concentrations (read at 570 nm wavelength). For detection of CARNS1 protein levels, 1  $\mu$ g of  
611 protein was diluted in loading buffer solution (63 mM Tris Base pH 6.8, 2% SDS, 10% glycerol, 0.004%

612 Bromophenol Blue, 0.1 M DTT), heated for 4 min at 95°C, and separated in polyacrylamide gels (4-15%,  
613 Mini-PROTEAN TGX, Bio-Rad) at 100-140 V on ice. Next, stain-free gels were imaged following UV  
614 exposure to visualise total protein content (ChemiDoc MP Imaging System, Bio-Rad). Proteins were  
615 transferred from the gel to an ethanol-immersed PVDF membrane in transfer buffer (30 min, 25 V, 1.0  
616 A, Trans-Blot Turbo Transfer System, Bio-Rad). Membranes were briefly washed in Tris-buffered saline  
617 with 0.1% Tween20 (TBS-T), and blocked for 30 min using 3% milk powder in TBS-T. Following overnight  
618 incubation at 4°C with primary antibodies against CARNS1 (rabbit polyclonal, 1:1000 in 3% milk/TBS-T,  
619 HPA038569, Sigma), membranes were washed (3 × 5 min), incubated with secondary HRP-conjugated  
620 goat anti-rabbit antibodies (1:5000 in 3% milk/TBS-T) for 60 min at room temperature, washed again  
621 (3 × 5 min), and chemiluminescent images were developed in a ChemiDoc MP Imaging System (Bio-  
622 Rad) using Clarity Western ECL substrate (Bio-Rad). CARNS1 protein bands were quantified with Image  
623 Lab 6.1 software (Bio-Rad), and normalized to total protein content from the stain-free image. Finally,  
624 bands were expressed relative to total CARNS1 expression (sum of all bands) of a particular mouse,  
625 rat, or human. For muscle, band densities were expressed as fold changes relative to the average  
626 density from soleus muscles per blot. Linearity of the signal was determined for every tissue.  
627 Differences between soleus and extensor digitorum longus CARNS1 content were analyzed using a  
628 paired t-test (rat) or Wilcoxon signed-rank test (mouse), depending on normality of the data.

629

#### 630 CARNS1 protein level in human single muscle fibers.

631 CARNS1 protein levels in type I vs. type II muscle fibers were determined based on a previously  
632 published method (70). Muscle samples in *RNAlater* (Thermo Fisher Scientific) were thawed and  
633 subsequently transferred to a petri dish filled with fresh *RNAlater* (Thermo Fisher Scientific) solution.  
634 Individual muscle fibers were manually dissected under a light microscope and immediately  
635 submerged in a new 0.5 mL tube with 5 µL ice-cold Laemmli buffer (125 mM Tris-HCl (pH 6.8), 10%  
636 glycerol, 125 mM SDS, 200 mM DTT, 0.004% bromophenol blue). Tubes were then incubated for 15  
637 min at 4°C, followed by 10 min at 70°C and then stored at -80°C until the next step of the analysis. A  
638 total of 40-72 fibers were isolated from 9 biopsies. Next, muscle fiber type (based on myosin heavy  
639 chain expression) was determined using dot blotting techniques. For this, 0.5 µL of the muscle fiber  
640 lysate was spotted onto two activated and equilibrated PVDF membranes, one for MHC I and one for  
641 MHC IIa. After air-drying the PVDF membrane for 30 min, it was re-activated in 96% ethanol and  
642 equilibrated in transfer buffer (8 mM Tris-base, 39 mM glycine, 0.015% SDS, 20% ethanol). The next  
643 steps are similar to standard Western blotting as described above, with primary antibodies for MHC I  
644 (A4.840, 1:1000 in 3% milk in TBS-T, DSHB) or MHC IIa (A4.74, 1:1000 in 3% milk in TBS-T, DSHB). Fiber



645 lysates were classified as type I or IIa fibers based on a positive stain for only the MHC I or IIa antibody  
646 (**Fig S1**). Next, fibers of the same type from the same subject were pooled (n=10-26 for type I and n=9-  
647 22 for type IIa fibers). CARNS1 protein content in these fiber type-specific samples were determined  
648 with standard Western blotting technique as described above, with loading of 5  $\mu$ L per pool. Band  
649 densities were expressed as fold changes relative to the average density from type I fibers per blot.  
650 Statistical analysis was performed using a Wilcoxon signed-rank test.

651

#### 652 CARNS1 mRNA expression

653 The fiber type-specific RNAseq dataset of Rubenstein *et al.* was downloaded from the GEO repository  
654 under accession number GSE130977 (18). This dataset consists of RNAseq data of pools of type I or  
655 type II fibers from m. vastus lateralis biopsies of 9 healthy, older men. For full details on generation of  
656 this dataset, we refer to the original publication. Raw counts were normalized with DESeq2 to allow  
657 for between-sample comparisons (71). First, normalized counts for *MYH2* (ENSG00000125414, type II  
658 fibers) and *MYH7* (ENSG00000092054, type I fibers) were extracted and assessed for each fiber pool  
659 as purity quality control. Based on this analysis, the fiber pools of one participant were excluded for  
660 further analysis. Next, normalized counts of *CARNS1* (ENSG00000172508) were extracted and  
661 compared between type I and type II fiber pools within each participant using a Wilcoxon signed-rank  
662 test.

663

#### 664 Immunohistochemical detection of CARNS1

665 Sagittal and frontal cryosections (10  $\mu$ m) were cut from whole mouse brains and human white matter  
666 samples. Following acetone fixation (10 min) and blocking (30 min, 10% donkey serum in PBS with 1%  
667 BSA), sections were exposed overnight at 4°C to antibodies detecting CARNS1 (rabbit polyclonal, 1:100  
668 in PBS with 1% BSA, HPA038569, Sigma). The next day, sections were washed and exposed to  
669 complementary secondary antibodies for 60 min (1:500 in PBS with 1% BSA, Thermo Fisher).  
670 Fluorescence imaging was performed with a Leica DM4000 B LED (Leica Microsystems). For double-  
671 labeling, we used the following antibodies: OLIG2 (1:50, goat polyclonal, AF2418, R&D Systems),  
672 neurofilament heavy polypeptide (NF-H, rabbit polyclonal, 1:200, ab8135, Abcam), CD68 (mouse  
673 monoclonal, 1:100, M0814 KP1 clone, Dako), GFAP (mouse monoclonal, 1:100, G3893, Sigma).  
674 Absence of CARNS1 from *Carns1*-KO brain sections was used as negative control.

675

676

677 Statistical analysis

678 Statistical analyses were performed in GraphPad Prism v9.4 and were described in the appropriate  
679 method paragraphs. Significance level was set at  $\alpha=0.05$ .

680

681 **References**

- 682 1. W. Gulewitsch, S. Amiradžibi, Ueber das Carnosin, eine neue organische Base des  
683 Fleischextractes. *Berichte der deutschen chemischen Gesellschaft* **33**, 1902-1903 (1900).
- 684 2. A. A. Boldyrev, G. Aldini, W. Derave, Physiology and pathophysiology of carnosine.  
685 *Physiological reviews* **93**, 1803-1845 (2013).
- 686 3. G. Aldini, B. de Courten, L. Regazzoni, E. Gilardoni, G. Ferrario, G. Baron, A. Altomare, A.  
687 D'Amato, G. Vistoli, M. Carini, Understanding the antioxidant and carbonyl sequestering  
688 activity of carnosine: Direct and indirect mechanisms. *Free Radical Research* **55**, 321-330  
689 (2021).
- 690 4. J. J. Matthews, M. D. Turner, L. Santos, K. J. Elliott-Sale, C. Sale, Carnosine increases insulin-  
691 stimulated glucose uptake and reduces methylglyoxal-modified proteins in type-2 diabetic  
692 human skeletal muscle cells. *Amino Acids*, 1-8 (2023).
- 693 5. B. Saunders, K. Elliott-Sale, G. G. Artioli, P. A. Swinton, E. Dolan, H. Roschel, C. Sale, B. Gualano,  
694  $\beta$ -alanine supplementation to improve exercise capacity and performance: a systematic  
695 review and meta-analysis. *British Journal of Sports Medicine* **51**, 658-669 (2017).
- 696 6. G. Aldini, M. Orioli, G. Rossoni, F. Savi, P. Braidotti, G. Vistoli, K. J. Yeum, G. Negrisoli, M. Carini,  
697 The carbonyl scavenger carnosine ameliorates dyslipidaemia and renal function in Zucker  
698 obese rats. *Journal of cellular and molecular medicine* **15**, 1339-1354 (2011).
- 699 7. E. J. Anderson, G. Vistoli, L. A. Katunga, K. Funai, L. Regazzoni, T. B. Monroe, E. Gilardoni, L.  
700 Cannizzaro, M. Colzani, D. De Maddis, A carnosine analog mitigates metabolic disorders of  
701 obesity by reducing carbonyl stress. *The Journal of clinical investigation* **128**, 5280-5293 (2018).
- 702 8. J. Spaas, W. Franssen, C. Keytsman, L. Blancquaert, T. Vanmierlo, J. Bogie, B. Broux, N. Hellings,  
703 J. van Horsen, D. K. Posa, Carnosine quenches the reactive carbonyl acrolein in the central  
704 nervous system and attenuates autoimmune neuroinflammation. *Journal of*  
705 *neuroinflammation* **18**, 1-19 (2021).
- 706 9. I. Everaert, Y. Taes, E. De Heer, H. Baelde, A. Zutinic, B. Yard, S. Sauerhöfer, L. Vanhee, J.  
707 Delanghe, G. Aldini, Low plasma carnosinase activity promotes carnosinemia after carnosine  
708 ingestion in humans. *American Journal of Physiology-Renal Physiology*, (2012).
- 709 10. M. Teufel, V. Saudek, J.-P. Ledig, A. Bernhardt, S. Boularand, A. Carreau, N. J. Cairns, C. Carter,  
710 D. J. Cowley, D. Duverger, Sequence identification and characterization of human carnosinase  
711 and a closely related non-specific dipeptidase. *Journal of Biological Chemistry* **278**, 6521-6531  
712 (2003).
- 713 11. J. Drozak, M. Veiga-da-Cunha, D. Vertommen, V. Stroobant, E. Van Schaftingen, Molecular  
714 identification of carnosine synthase as ATP-grasp domain-containing protein 1 (ATPGD1).  
715 *Journal of biological chemistry* **285**, 9346-9356 (2010).
- 716 12. J. V. Creighton, L. de Souza Gonçalves, G. G. Artioli, D. Tan, K. J. Elliott-Sale, M. D. Turner, C. L.  
717 Doig, C. Sale, Physiological Roles of Carnosine in Myocardial Function and Health. *Advances in*  
718 *Nutrition* **13**, 1914-1929 (2022).
- 719 13. G. Aldini, M. Orioli, M. Carini, R. Maffei Facino, Profiling histidine-containing dipeptides in rat  
720 tissues by liquid chromatography/electrospray ionization tandem mass spectrometry. *Journal*  
721 *of mass spectrometry* **39**, 1417-1428 (2004).

- 722 14. L. Wang-Eckhardt, A. Bastian, T. Bruegmann, P. Sasse, M. Eckhardt, Carnosine synthase  
723 deficiency is compatible with normal skeletal muscle and olfactory function but causes  
724 reduced olfactory sensitivity in aging mice. *Journal of Biological Chemistry*, jbc. RA120. 014188  
725 (2020).
- 726 15. J. Spaas, P. Van Noten, C. Keytsman, I. Nieste, L. Blancquaert, W. Derave, B. O. Eijnde,  
727 Carnosine and skeletal muscle dysfunction in a rodent multiple sclerosis model. *Amino Acids*  
728 **53**, 1749-1761 (2021).
- 729 16. I. Everaert, S. Stegen, B. Vanheel, Y. Taes, W. Derave, Effect of beta-alanine and carnosine  
730 supplementation on muscle contractility in mice. *Med Sci Sports Exerc* **45**, 43-51 (2013).
- 731 17. L. Luo, W. Ma, K. Liang, Y. Wang, J. Su, R. Liu, T. Liu, N. Shyh-Chang, Spatial metabolomics  
732 reveals skeletal myofiber subtypes. *Science Advances* **9**, eadd0455 (2023).
- 733 18. A. B. Rubenstein, G. R. Smith, U. Raue, G. Begue, K. Minchev, F. Ruf-Zamojski, V. D. Nair, X.  
734 Wang, L. Zhou, E. Zaslavsky, Single-cell transcriptional profiles in human skeletal muscle.  
735 *Scientific reports* **10**, 1-15 (2020).
- 736 19. N. Nordsborg, M. Mohr, L. D. Pedersen, J. J. Nielsen, H. Langberg, J. Bangsbo, Muscle interstitial  
737 potassium kinetics during intense exhaustive exercise: effect of previous arm exercise.  
738 *American Journal of Physiology-Regulatory, Integrative and Comparative Physiology* **285**,  
739 R143-R148 (2003).
- 740 20. A. Reddy, L. H. Bozi, O. K. Yaghi, E. L. Mills, H. Xiao, H. E. Nicholson, M. Paschini, J. A. Paulo, R.  
741 Garrity, D. Laznik-Bogoslavski, pH-gated succinate secretion regulates muscle remodeling in  
742 response to exercise. *Cell* **183**, 62-75. e17 (2020).
- 743 21. M. J. Mittenbühler, M. P. Jedrychowski, J. G. Van Vranken, H.-G. Sprenger, S. Wilensky, P. A.  
744 Dumesic, Y. Sun, A. Tartaglia, D. Bogoslavski, A. Mu, Isolation of extracellular fluids reveals  
745 novel secreted bioactive proteins from muscle and fat tissues. *Cell Metabolism*, (2023).
- 746 22. M. A. Kamal, H. Jiang, Y. Hu, R. F. Keep, D. E. Smith, Influence of genetic knockout of Pept2 on  
747 the in vivo disposition of endogenous and exogenous carnosine in wild-type and Pept2 null  
748 mice. *American Journal of Physiology-Regulatory, Integrative and Comparative Physiology* **296**,  
749 R986-R991 (2009).
- 750 23. V. Peters, C. Q. Klessens, H. J. Baelde, B. Singler, K. A. Veraar, A. Zutinic, J. Drozak, J. Zschocke,  
751 C. P. Schmitt, E. de Heer, Intrinsic carnosine metabolism in the human kidney. *Amino acids* **47**,  
752 2541-2550 (2015).
- 753 24. T. Weigand, F. Colbatzky, T. Pfeffer, S. F. Garbade, K. Klingbeil, F. Colbatzky, M. Becker, J.  
754 Zemva, R. Bulkescher, R. Schürfeld, A global Cndp1-knock-out selectively increases renal  
755 carnosine and anserine concentrations in an age-and gender-specific manner in mice.  
756 *International journal of molecular sciences* **21**, 4887 (2020).
- 757 25. E. Heidenreich, T. Pfeffer, T. Kracke, N. Mechtel, P. Nawroth, G. F. Hoffmann, C. P. Schmitt, R.  
758 Hell, G. Poschet, V. Peters, A Novel UPLC-MS/MS Method Identifies Organ-Specific Dipeptide  
759 Profiles. *International journal of molecular sciences* **22**, 9979 (2021).
- 760 26. D. Abraham, J. J. Pisano, S. Udenfriend, The distribution of homocarnosine in mammals.  
761 *Archives of biochemistry and biophysics* **99**, 210-213 (1962).
- 762 27. S. J. Kish, T. L. Perry, S. Hansen, Regional distribution of homocarnosine, homocarnosine-  
763 carnosine synthetase and homocarnosinase in human brain. *Journal of neurochemistry* **32**,  
764 1629-1636 (1979).
- 765 28. W. Derave, I. Everaert, S. Beeckman, A. Baguet, Muscle carnosine metabolism and  $\beta$ -alanine  
766 supplementation in relation to exercise and training. *Sports medicine* **40**, 247-263 (2010).
- 767 29. A. Mannion, P. Jakeman, M. Dunnett, R. Harris, P. Willan, Carnosine and anserine  
768 concentrations in the quadriceps femoris muscle of healthy humans. *European journal of*  
769 *applied physiology and occupational physiology* **64**, 47-50 (1992).
- 770 30. R. C. Harris, M. Dunnett, P. L. Greenhaff, Carnosine and taurine contents in individual fibres of  
771 human vastus lateralis muscle. *Journal of Sports Sciences* **16**, 639-643 (1998).
- 772 31. A. Baguet, I. Everaert, H. De Naeyer, H. Reyngoudt, S. Stegen, S. Beeckman, E. Achten, L.  
773 Vanhee, A. Volckaert, M. Petrovic, Effects of sprint training combined with vegetarian or mixed

- 774 diet on muscle carnosine content and buffering capacity. *European journal of applied*  
775 *physiology* **111**, 2571-2580 (2011).
- 776 32. W. Zhou, S. Yang, P. G. Wang. (Future Science, 2017), vol. 9, pp. 1839-1844.
- 777 33. F. L. Margolis, Carnosine in the primary olfactory pathway. *Science* **184**, 909-911 (1974).
- 778 34. E. Mahootchi, S. Cannon Homaei, R. Kleppe, I. Winge, T.-A. Hegvik, R. Megias-Perez, C. Totland,  
779 F. Mogavero, A. Baumann, J. C. Glennon, GADL1 is a multifunctional decarboxylase with tissue-  
780 specific roles in  $\beta$ -alanine and carnosine production. *Science Advances* **6**, eabb3713 (2020).
- 781 35. Y. Zhang, K. Chen, S. A. Sloan, M. L. Bennett, A. R. Scholze, S. O'Keefe, H. P. Phatnani, P.  
782 Guarnieri, C. Caneda, N. Ruderisch, An RNA-sequencing transcriptome and splicing database  
783 of glia, neurons, and vascular cells of the cerebral cortex. *Journal of Neuroscience* **34**, 11929-  
784 11947 (2014).
- 785 36. T. M. Consortium, S. t. w. group, Single-cell transcriptomics of 20 mouse organs creates a  
786 Tabula Muris. *Nature* **562**, 367-372 (2018).
- 787 37. J. J. O'Dowd, D. J. Robins, D. J. Miller, Detection, characterisation, and quantification of  
788 carnosine and other histidyl derivatives in cardiac and skeletal muscle. *Biochimica et*  
789 *Biophysica Acta (BBA)-General Subjects* **967**, 241-249 (1988).
- 790 38. K. Yan, Z. Mei, J. Zhao, M. A. I. Prophan, D. Obal, K. Katragadda, B. Doelling, D. Hoetker, D. K.  
791 Posa, L. He, Integrated Multilayer Omics Reveals the Genomic, Proteomic, and Metabolic  
792 Influences of Histidyl Dipeptides on the Heart. *Journal of the American Heart Association* **11**,  
793 e023868 (2022).
- 794 39. J. Zhao, D. J. Conklin, Y. Guo, X. Zhang, D. Obal, L. Guo, G. Jagatheesan, K. Katragadda, L. He, X.  
795 Yin, Cardiospecific Overexpression of ATPGD1 (Carnosine Synthase) Increases Histidine  
796 Dipeptide Levels and Prevents Myocardial Ischemia Reperfusion Injury. *Journal of the*  
797 *American Heart Association*, e015222 (2020).
- 798 40. L. de Souza Gonçalves, L. P. Sales, T. R. Saito, J. C. Campos, A. L. Fernandes, J. Natali, L. Jensen,  
799 A. Arnold, L. Ramalho, L. R. G. Bechara, Histidine dipeptides are key regulators of excitation-  
800 contraction coupling in cardiac muscle: Evidence from a novel CARNS1 knockout rat model.  
801 *Redox biology* **44**, 102016 (2021).
- 802 41. P. Swietach, J.-B. Youm, N. Saegusa, C.-H. Leem, K. W. Spitzer, R. D. Vaughan-Jones, Coupled  
803  $\text{Ca}^{2+}/\text{H}^{+}$  transport by cytoplasmic buffers regulates local  $\text{Ca}^{2+}$  and  $\text{H}^{+}$  ion signaling.  
804 *Proceedings of the National Academy of Sciences* **110**, E2064-E2073 (2013).
- 805 42. P. Swietach, C. H. Leem, K. W. Spitzer, R. D. Vaughan-Jones, Pumping  $\text{Ca}^{2+}$  up  $\text{H}^{+}$  gradients: A  
806  $\text{Ca}^{2+}-\text{H}^{+}$  exchanger without a membrane. *The Journal of physiology* **592**, 3179-3188 (2014).
- 807 43. M. Gardner, K. M. Illingworth, J. Kelleher, D. Wood, Intestinal absorption of the intact peptide  
808 carnosine in man, and comparison with intestinal permeability to lactulose. *The Journal of*  
809 *physiology* **439**, 411-422 (1991).
- 810 44. R. C. Harris, M. Tallon, M. Dunnett, L. Boobis, J. Coakley, H. J. Kim, J. L. Fallowfield, C. Hill, C.  
811 Sale, J. A. Wise, The absorption of orally supplied  $\beta$ -alanine and its effect on muscle carnosine  
812 synthesis in human vastus lateralis. *Amino acids* **30**, 279-289 (2006).
- 813 45. A. Baguet, I. Everaert, B. Yard, V. Peters, J. Zschocke, A. Zutinic, E. De Heer, T. Podgórski, K.  
814 Domaszewska, W. Derave, Does low serum carnosinase activity favour high-intensity exercise  
815 capacity? *American Journal of Physiology-Heart and Circulatory Physiology*, (2014).
- 816 46. V. K. Pandya, B. Sonwane, R. Rathore, A. Unnikrishnan, S. Kumaran, M. J. Kulkarni,  
817 Development of multiple reaction monitoring assay for quantification of carnosine in human  
818 plasma. *RSC advances* **10**, 763-769 (2020).
- 819 47. S. de Jager, L. Blancquaert, T. Van der Stede, E. Lievens, S. De Baere, S. Croubels, E. Gilardoni,  
820 L. G. Regazzoni, G. Aldini, J. G. Bourgois, The ergogenic effect of acute carnosine and anserine  
821 supplementation: dosing, timing, and underlying mechanism. *Journal of the International*  
822 *Society of Sports Nutrition* **19**, 70-91 (2022).
- 823 48. H. Oppermann, S. Elsel, C. Birkemeyer, J. Meixensberger, F. Gaunitz, Erythrocytes prevent  
824 degradation of carnosine by human serum carnosinase. *International journal of molecular*  
825 *sciences* **22**, 12802 (2021).

- 826 49. K. Nagai, A. Niijima, T. Yamano, H. Otani, N. Okumra, N. Tsuruoka, M. Nakai, Y. Kiso, Possible  
827 role of L-carnosine in the regulation of blood glucose through controlling autonomic nerves.  
828 *Experimental biology and medicine* **228**, 1138-1145 (2003).
- 829 50. M. C. K. Severinsen, B. K. Pedersen, Muscle–organ crosstalk: the emerging roles of myokines.  
830 *Endocrine reviews* **41**, 594-609 (2020).
- 831 51. B. K. Pedersen, M. A. Febbraio, Muscles, exercise and obesity: skeletal muscle as a secretory  
832 organ. *Nature Reviews Endocrinology* **8**, 457-465 (2012).
- 833 52. R. M. Murphy, M. J. Watt, M. A. Febbraio, Metabolic communication during exercise. *Nature*  
834 *metabolism* **2**, 805-816 (2020).
- 835 53. M. E. Nelson, S. Madsen, K. C. Cooke, A. M. Fritzen, I. H. Thorius, S. W. Masson, L. Carroll, F. C.  
836 Weiss, M. M. Seldin, M. Potter, Systems-level analysis of insulin action in mouse strains  
837 provides insight into tissue-and pathway-specific interactions that drive insulin resistance. *Cell*  
838 *Metabolism* **34**, 227-239. e226 (2022).
- 839 54. H. Ihara, Y. Kakihana, A. Yamakage, K. Kai, T. Shibata, M. Nishida, K.-i. Yamada, K. Uchida, 2-  
840 Oxo-histidine–containing dipeptides are functional oxidation products. *Journal of Biological*  
841 *Chemistry* **294**, 1279-1289 (2019).
- 842 55. S. P. Baba, J. D. Hoetker, M. Merchant, J. B. Klein, J. Cai, O. A. Barski, D. J. Conklin, A. Bhatnagar,  
843 Role of aldose reductase in the metabolism and detoxification of carnosine-acrolein  
844 conjugates. *Journal of Biological Chemistry* **288**, 28163-28179 (2013).
- 845 56. V. H. Carvalho, A. H. Oliveira, L. F. de Oliveira, R. P. da Silva, P. Di Mascio, B. Gualano, G. G.  
846 Artioli, M. H. Medeiros, Exercise and  $\beta$ -alanine supplementation on carnosine-acrolein adduct  
847 in skeletal muscle. *Redox biology* **18**, 222-228 (2018).
- 848 57. L. Wang-Eckhardt, I. Becker, Y. Wang, J. Yuan, M. Eckhardt, Absence of endogenous carnosine  
849 synthesis does not increase protein carbonylation and advanced lipoxidation end products in  
850 brain, kidney or muscle. *Amino Acids*, 1-11 (2022).
- 851 58. T. Van der Stede, L. Blancquaert, F. Stassen, I. Everaert, R. Van Thienen, C. Vervae, L.  
852 Gliemann, Y. Hellsten, W. Derave, Histamine H1 and H2 receptors are essential transducers of  
853 the integrative exercise training response in humans. *Science Advances* **7**, eabf2856 (2021).
- 854 59. K. Verboven, K. Wouters, K. Gaens, D. Hansen, M. Bijnen, S. Wetzels, C. D. Stehouwer, G. H.  
855 Goossens, C. G. Schalkwijk, E. E. Blaak, Abdominal subcutaneous and visceral adipocyte size,  
856 lipolysis and inflammation relate to insulin resistance in male obese humans. *Scientific reports*  
857 **8**, 1-8 (2018).
- 858 60. F. Van de Velde, D. M. Ouwens, A.-H. Batens, Y. Van Nieuwenhove, B. Lapauw, Divergent  
859 dynamics in systemic and tissue-specific metabolic and inflammatory responses during weight  
860 loss in subjects with obesity. *Cytokine* **144**, 155587 (2021).
- 861 61. R. Chaleckis, I. Murakami, J. Takada, H. Kondoh, M. Yanagida, Individual variability in human  
862 blood metabolites identifies age-related differences. *Proceedings of the National Academy of*  
863 *Sciences* **113**, 4252-4259 (2016).
- 864 62. J. De Brandt, W. Derave, F. Vandenabeele, P. Pomiès, L. Blancquaert, C. Keytsman, M. S.  
865 Barusso-Grüniger, F. F. de Lima, M. Hayot, M. A. Spruit, Efficacy of 12 weeks oral beta-alanine  
866 supplementation in patients with chronic obstructive pulmonary disease: a double-blind,  
867 randomized, placebo-controlled trial. *Journal of cachexia, sarcopenia and muscle* **13**, 2361-  
868 2372 (2022).
- 869 63. L. Gliemann, N. Rytter, P. Piil, J. Nilton, T. Lind, M. Nyberg, M. Cocks, Y. Hellsten, The  
870 endothelial mechanotransduction protein platelet endothelial cell adhesion molecule-1 is  
871 influenced by aging and exercise training in human skeletal muscle. *Frontiers in physiology* **9**,  
872 1807 (2018).
- 873 64. L. Gliemann, N. Rytter, A. Tamariz-Elleemann, J. Egelund, N. Brandt, H. H. Carter, Y. Hellsten,  
874 Lifelong Physical Activity Determines Vascular Function in Late Postmenopausal Women.  
875 *Medicine and Science in Sports and Exercise* **52**, 627-636 (2020).

- 876 65. L. Olsen, B. Hoier, C. Hansen, M. Leinum, H. Carter, T. Jorgensen, J. Bangsbo, Y. Hellsten,  
877 Angiogenic potential is reduced in skeletal muscle of aged women. *The Journal of Physiology*  
878 **598**, 5149-5164 (2020).
- 879 66. C. Hansen, S. Møller, T. Ehlers, K. A. Wickham, J. Bangsbo, L. Gliemann, Y. Hellsten, Redox  
880 balance in human skeletal muscle-derived endothelial cells-Effect of exercise training. *Free*  
881 *Radical Biology and Medicine* **179**, 144-155 (2022).
- 882 67. B. Høier, K. Olsen, M. Nyberg, J. Bangsbo, Y. Hellsten, Contraction-induced secretion of VEGF  
883 from skeletal muscle cells is mediated by adenosine. *American Journal of Physiology-Heart and*  
884 *Circulatory Physiology* **299**, H857-H862 (2010).
- 885 68. C. G. Perry, D. A. Kane, C.-T. Lin, R. Kozy, B. L. Cathey, D. S. Lark, C. L. Kane, P. M. Brophy, T. P.  
886 Gavin, E. J. Anderson, Inhibiting myosin-ATPase reveals a dynamic range of mitochondrial  
887 respiratory control in skeletal muscle. *Biochemical Journal* **437**, 215-222 (2011).
- 888 69. S. de Jager, S. Van Damme, S. De Baere, S. Croubels, R. Jäger, M. Purpura, E. Lievens, J. G.  
889 Bourgois, W. Derave, No Effect of Acute Balenine Supplementation on Maximal and  
890 Submaximal Exercise Performance in Recreational Cyclists. *International Journal of Sport*  
891 *Nutrition and Exercise Metabolism* **1**, 1-9 (2023).
- 892 70. M. R. Larsen, D. E. Steenberg, J. B. Birk, K. A. Sjøberg, B. Kiens, E. A. Richter, J. F. Wojtaszewski,  
893 The insulin-sensitizing effect of a single exercise bout is similar in type I and type II human  
894 muscle fibres. *The Journal of Physiology* **598**, 5687-5699 (2020).
- 895 71. M. I. Love, W. Huber, S. Anders, Moderated estimation of fold change and dispersion for RNA-  
896 seq data with DESeq2. *Genome biology* **15**, 1-21 (2014).
- 897

## 898 **Acknowledgements**

899 For human brain tissues, all material has been collected from donors for or from whom a written  
900 informed consent for a brain autopsy and the use of the material and clinical information for research  
901 purposes had been obtained by the Netherlands Brain Bank (NBB). The experiment protocols and  
902 methods used for analysing brain samples were conducted with the approval of the NBB and the  
903 Medical Ethical Committee of Hasselt University, and carried out according to institutional guidelines.  
904 All HCDs analyses were performed using an UHPLC-MS/MS instrument part of the Ghent University  
905 MSsmall Expertise Centre for advanced mass spectrometry analysis of small organic molecules. Also,  
906 the University Biobank Limburg (UBiLim) is acknowledged for providing storage and release of some  
907 human biological material used in this publication. Figure 7D, 7E, 7F and FG (experimental setups) were  
908 created in BioRender. The technical assistance of Jens Jung Nielsen, Anneke Volkaert, Thomas Ehlers,  
909 Nicklas Frisch and Josephine Rol is greatly appreciated.

## 910 **Funding**

911 Research Foundation-Flanders – FWO 11B4220N (TVDS)  
912 Research Foundation-Flanders – FWO 1138520N (JS)  
913 Research Foundation-Flanders – FWO 11C0421N (SDJ)  
914 Research Foundation-Flanders – FWO V433222N (TVDS)  
915 Research Foundation-Flanders – FWO G080321N (WD)

## 916 **Author contributions**

917 TVDS, JS, SDJ and WD designed the study.  
918 TVDS, JS, SDJ, BVer and CH performed the experiments and/or biochemical analyses.  
919 TVDS, JS, SDJ, JDB, RVT, KV, DH, TB, BL, CVP, KD, BVan and LG contributed to tissue collection.  
920 SC, BO, LG, YH and WD supervised the study.  
921 TVDS, JS, SDJ and WD analyzed the data.  
922 TVDS, JS and WD drafted the manuscript.  
923 All authors approved the final version of the manuscript.

## 924 **Competing interests**

925 The authors declare that they have no competing interests.

## 926 **Data and materials availability**

927 All data needed to evaluate the conclusions in the paper are present in the manuscript and  
928 supplementary materials. Additional data related to this paper can be obtained upon reasonable  
929 request to the author.
